## **SUMOylation of SAMHD1 at Lysine 595 is required for HIV-1 restriction in non-cycling cells**

Charlotte Martinat<sup>1,§</sup>, Arthur Cormier<sup>1,§</sup>, Joëlle Tobaly-Tapiero<sup>1</sup>, Noé Palmic<sup>1</sup>, Nicoletta Casartelli<sup>2,3</sup>, Si'Ana A. Coggins<sup>4</sup>, Julian Buchrieser<sup>2,3,5</sup>, Mirjana Persaud<sup>6</sup>, Felipe Diaz-Griffero<sup>6</sup>, Lucile Espert<sup>7</sup>, Guillaume Bossis<sup>8</sup>, Pascale Lesage<sup>1</sup>, Olivier Schwartz<sup>2,3</sup>, Baek Kim<sup>4</sup>, Florence Margottin-Goguet<sup>9</sup>, Ali Saïb<sup>1</sup>, Alessia Zamborlini<sup>1,10,\*</sup>

<sup>1</sup>INSERM U944, CNRS UMR 7212, Genomes & Cell Biology of Disease Unit, Institut de Recherche Saint-Louis, Université de Paris, Hôpital Saint-Louis, Paris, France.

<sup>2</sup>Institut Pasteur, Virus and Immunity Unit, CNRS-UMR3569, Paris, France.

<sup>3</sup>Vaccine Research Institute, Créteil, France.

<sup>4</sup>Emory School of Medicine, Atlanta, USA.

<sup>5</sup>James Martin Stem Cell Facility, Sir William Dunn School of Pathology, University of Oxford, Oxford, OX1 3RE, UK.

<sup>6</sup>Albert Einstein College of Medicine, Microbiology and Immunology, Bronx, NY, 10461, USA.

<sup>7</sup>IRIM, University of Montpellier, UMR 9004 CNRS, 34293 Montpellier, France.

<sup>8</sup>GMM, Univ Montpellier, CNRS, Montpellier, France.

<sup>9</sup>Université de Paris, Institut Cochin, INSERM, CNRS, F-75014 PARIS, France

<sup>10</sup>Institute for Integrative Biology of the Cell (I2BC), CEA, CNRS, Univ. Paris-Sud, Université Paris-Saclay, France.

These authors contributed equally: Charlotte Martinat, Arthur Cormier.

Correspondence and requests for materials should be addressed to A. Zamborlini: [alessia.zamborlini@universite-paris-saclay.fr](mailto:alessia.zamborlini@universite-paris-saclay.fr)

## 1 Abstract

2 SAMHD1 is a cellular triphosphohydrolase (dNTPase) proposed to inhibit HIV-1 reverse  
3 transcription in non-cycling immune cells by limiting the supply of the dNTP substrates. Yet,  
4 phosphorylation of T592 downregulates SAMHD1 antiviral activity, but not its dNTPase  
5 function, implying that additional mechanisms contribute to viral restriction. Here, we show  
6 that SAMHD1 is SUMOylated on residue K595, a modification that relies on the presence of  
7 a proximal SUMO-interacting motif (SIM). Loss of K595 SUMOylation suppresses the  
8 restriction activity of SAMHD1, even in the context of the constitutively active phospho-  
9 ablative T592A mutant but has no impact on dNTP depletion. Conversely, the artificial fusion  
10 of SUMO to a non-SUMOylatable inactive SAMHD1 variant restores its antiviral function.  
11 These observations clearly establish that the absence of T592 phosphorylation cannot fully  
12 account for the restriction activity of SAMHD1. We find that concomitant SUMOylation of  
13 K595 is required to stimulate a dNTPase-independent antiviral activity.

14

## 15 Introduction

16 Sterile alpha-motif (SAM) and histidine-aspartate (HD) domain-containing protein 1  
17 (SAMHD1) is a cellular triphosphohydrolase (dNTPase) that inhibits the replication of the  
18 human immunodeficiency virus type 1 (HIV-1) in non-cycling immune cells such as  
19 macrophages, monocytes, dendritic cells and resting T4 lymphocytes<sup>1-5</sup>. This antiviral  
20 function is largely attributed to the ability of SAMHD1 to hydrolyze dNTPs into the  
21 desoxynucleoside and triphosphate components<sup>6-8</sup> thereby reducing the cellular dNTP  
22 supply below a threshold required for efficient reverse transcription of the viral RNA  
23 genome<sup>9,10</sup>. In contrast to HIV-1, the related HIV-2 virus counteracts this restriction by  
24 expressing the Vpx accessory protein which promotes the degradation of SAMHD1 through  
25 the ubiquitin-proteasome system<sup>3-5,11,12</sup>. SAMHD1 depletion is accompanied by both dNTP  
26 pools expansion and increased cell permissiveness to HIV-1 infection<sup>8,13</sup> indicating that the  
27 dNTPase and restriction functions are linked.

28 SAMHD1 is an ubiquitous protein<sup>2,14,15</sup>. Yet, its anti-HIV-1 activity is witnessed only in non-  
29 cycling cells, pointing to the involvement of post-translational regulatory mechanisms. It is  
30 now well established that residue T592 is phosphorylated by the cyclin/CDK complexes  
31 during the G1/S transition<sup>16-18</sup> and dephosphorylated by members of the phosphoprotein  
32 phosphatase (PPP) family upon mitotic exit<sup>19,20</sup>. This modification likely enables SAMHD1 to  
33 promote the progression of replication forks in dividing cells<sup>21</sup>. Phosphorylation at T592 is  
34 weak to undetectable in non-cycling cells refractory to HIV-1<sup>19,20,22</sup>, suggesting that only  
35 dephosphorylated SAMHD1 might be restriction-competent. Consistent with this model,  
36 mutation of T592 into D or E to mimic phosphorylation renders SAMHD1 antivirally  
37 inactive<sup>17,18,23,24</sup>. However, the phosphomimetic variants retain WT dNTPase function<sup>18,24,25</sup>.

38 In the same line, SAMHD1 prevents dNTP pools expansion throughout the cell cycle,  
39 regardless of its phosphorylation status<sup>20</sup>. Altogether these data question whether the  
40 establishment of a SAMHD1-mediated antiviral state might only rely on dNTP depletion  
41 and/or regulation by T592 phosphorylation. Reports that SAMHD1 degrades the incoming  
42 viral RNA genome through a ribonuclease activity remain controversial<sup>23,26-30</sup>, calling for  
43 additional investigations to clarify the molecular mechanisms underlying its viral restriction  
44 function.

45 Interestingly, SAMHD1 was a hit in recent large-scale proteomic studies investigating the  
46 cellular substrates of SUMOylation<sup>31,32</sup>, a dynamic post-translational modification (PTM) and  
47 an important regulator of many fundamental cellular processes including immune  
48 responses<sup>33</sup>. SUMOylation consists in the conjugation of a single Small Ubiquitin-like Modifier  
49 (SUMO) moiety or a polymeric SUMO chain to a protein substrate through the sequential  
50 action of a dedicated set of E1-activating, E2-conjugating and E3-ligating enzymes.  
51 SUMOylation is reversed by SUMO-specific proteases (e.g. SENP)<sup>34</sup>. Human cells express  
52 three ubiquitous SUMO paralogs. SUMO1 shares ~50% of sequence homology with SUMO2  
53 and SUMO3, which are ~90% similar and thus referred to as SUMO2/3<sup>35</sup>. SUMOylation often  
54 targets the Lysine (K) residue lying within the consensus motif  $\phi$ Kx $\alpha$  ( $\phi$ : hydrophobic amino  
55 acid, x: any amino acid and  $\alpha$ : an acidic residue) that represents the binding site for the  
56 unique SUMO E2 conjugating enzyme Ubc9<sup>36,37</sup>. A proximal SUMO-interacting motif (SIM),  
57 which typically consists of a short stretch of surface-exposed aliphatic residues<sup>38</sup>, might  
58 sometimes contribute to the recruitment and the optimal orientation of the SUMO-charged  
59 Ubc9, allowing an efficient transfer of SUMO to the substrate. A SIM might also constitute a  
60 binding interface for SUMO-conjugated partners that mediate the downstream consequences  
61 of SUMOylation.

62 In this study we show that SAMHD1 undergoes SIM-mediated SUMOylation of the  
63 evolutionarily conserved K595 residue, which is part of the CDK-targeted motif driving T592  
64 phosphorylation (<sup>592</sup>TPQK<sup>595</sup>). Preventing K595 SUMOylation by mutation of either key  
65 residues of the SUMO-consensus motif or the SIM (<sup>488</sup>LLDV<sup>501</sup>) invariably suppressed  
66 SAMHD1-mediated viral restriction, but not its dNTPase activity. This was true even when  
67 T592 was dephosphorylated and therefore SAMHD1 expected to be antivirally active. These  
68 observations suggest that the status of T592 phosphorylation cannot fully account for the  
69 regulation of the restriction activity of SAMHD1. Finding that the artificial fusion of SUMO to  
70 an inactive C-terminal truncation mutant (lacking both T592 phosphorylation and K595  
71 SUMOylation) restored the inhibition of viral infection, further supports the requirement of  
72 SUMO conjugation to K595 for the establishment of a SAMHD1-dependent antiviral state in  
73 non-cycling immune cells.

74

75

76

## 77 **Results**

### 78 **SAMHD1 is a SUMO target**

79 To investigate if SAMHD1 is a SUMO substrate, we used a 293T cell-based assay where  
80 we expressed HA-SAMHD1 together with each 6xHis-tagged SUMO paralog and the SUMO  
81 E2 conjugating enzyme Ubc9. Cells were treated or not with the proteasome inhibitor  
82 MG132, to favor the accumulation of SUMO-conjugated proteins<sup>39</sup>. Next, samples were lysed  
83 in denaturing conditions to inhibit the highly active SUMO proteases and preserve  
84 SUMOylation. Following enrichment of SUMO-conjugated proteins by histidine affinity, the  
85 fraction of SUMOylated SAMHD1 was detected with an anti-HA antibody. A ~100 kDa band,  
86 consistent with the expected size of SAMHD1 conjugated to a SUMO moiety, was visualized  
87 in SUMO2- and SUMO3-expressing cells, at baseline (**Fig. 1A**, lanes 3 and 4). Proteasome  
88 inhibition caused an accumulation of high molecular-weight SAMHD1 species, which are  
89 likely SUMO chain conjugates, pointing to a potential role of SUMOylation in the control of  
90 the protein turnover (**Fig. 1A**, lanes 7 and 8). Modified SAMHD1 forms were undetectable in  
91 cells expressing SUMO1 or transfected with the empty plasmid, although the expression  
92 levels of SAMHD1 and SUMO isoforms were similar in all samples (**Fig. 1A**, lanes 1, 2, 5 and  
93 6).

94 Having confirmed that SAMHD1 is modified by ectopically expressed SUMO paralogs, we  
95 tested its conjugation by endogenous SUMOs. To this aim, HA-SAMHD1 was over-  
96 expressed by either transfection of 293T cells or lentiviral transduction of the human  
97 monocytic U937 cell line, which lacks measurable levels of endogenous SAMHD1 and  
98 acquires a macrophage-like phenotype when exposed to phorbol 12-myristate 13-acetate  
99 (PMA). After lysis in stringent conditions, SAMHD1 and its post-translational derivatives were  
100 enriched on HA-matrix beads. Consistent with the previous experiment, a ladder of SUMO-  
101 conjugates was visualized with anti-SUMO2/3 antibodies in both actively dividing (**Fig. 1B**,  
102 293T) and non-dividing cells (**Fig. 1C**, PMA-U937). Under these experimental conditions,  
103 modification of SAMHD1 by SUMO1 was also detected (**Fig. 1B** and **1C**, upper panels, lane  
104 2).

105 To extend these findings, we used the proximity-ligation assay (PLA)<sup>40,41</sup> to analyze the  
106 interaction between endogenous SAMHD1 and SUMO in human monocytic THP1 cells  
107 differentiated into macrophage-like cells by PMA treatment. As both SAMHD1 and the SUMO  
108 machinery are enriched in the nucleus, it was not surprising to detect fluorescent dots  
109 (~3.24±0.2, per cell) indicative of the SAMHD1-SUMO2/3 association mainly in this  
110 compartment (**Fig. 1D**). Importantly, a 2-hour incubation with either ginkgolic acid (GA) or its  
111 structurally related analog anacardic acid (AA), which block SUMO conjugation by inhibiting

112 the E1 SUMO-activating enzyme<sup>42</sup>, lowered the frequency of the PLA signal by ~2- to ~2.8-  
113 fold, respectively, thereby confirming the relevance of the PLA approach to study the  
114 SAMHD1-SUMO2/3 interaction (**Fig. 1D**). While the proximity labeling was markedly  
115 diminished upon exposure to SUMOylation inhibitors, SAMHD1 localization (**Fig. 1D**) and  
116 general expression as well as the global amount of SUMO2/3-conjugates were unaffected  
117 (**Fig. S1**). An interaction between SAMHD1 and SUMO1 was also visualized in the nucleus  
118 of differentiated THP1, but not SAMHD1-negative U937 cells, further validating the specificity  
119 of the SAMHD1-SUMO PLA signal (**Fig. S2**). Altogether, these data show that SAMHD1 is  
120 conjugated by SUMO1 and SUMO2/3 in the nucleus of both cycling and differentiated cells.

121

### 122 **Lysine residues at position 469, 595 and 622 are the main SUMOylation sites of** 123 **SAMHD1**

124 Among several potential SUMO-attachment sites identified by high-resolution proteomic  
125 studies in human SAMHD1, residues K469, K595 and K622 were the most frequent hits  
126 (**Table S1**). Protein sequence alignment shows that the position corresponding to amino acid  
127 595 of human SAMHD1, which is the last residue of the CDK-targeted <sup>592</sup>TPQK<sup>595</sup> motif  
128 (general consensus [S/T]Px[K/R]<sup>43</sup>), is invariably occupied by K, except for the murine  
129 isoform 2 (**Fig. S3**). Conversely, K469 and K622 are conserved among primate orthologs,  
130 with the former also found in prosimian, equine and koala isoforms (**Fig. S3**). To confirm that  
131 the identified sites are modified by SUMO, we performed the 293T-based SUMOylation  
132 assay using SAMHD1 mutants where the candidate K residues were changed into either  
133 arginine (R), to preserve a basic character, or alanine (A) (**Fig. 2A**). Alternatively, we mutated  
134 the acidic residue at position +2 of the SUMO-acceptor K residue that is essential for the  
135 recruitment of Ubc9, the unique E2 SUMO-conjugating enzyme<sup>36,37</sup> (**Fig. 2A**). We focused  
136 our analyses on the SUMO2 paralog because i) the pool of SUMO2 and SUMO3 available  
137 for conjugation exceeds that of SUMO1<sup>44</sup> and ii) SUMO2 and SUMO3 differ only by three  
138 amino acids and are undistinguishable with available antibodies<sup>45</sup>. Mutation of individual  
139 amino acids had a negligible effect on the electrophoretic mobility of SAMHD1 SUMO-  
140 conjugates both at baseline (**Fig. 2B**) and upon proteasome inhibition (**Fig. S4A**) indicating  
141 that multiple sites might be modified simultaneously. To test this idea, we monitored the  
142 SUMOylation pattern of SAMHD1 variants where candidate sites were inactivated in various  
143 combination. Hereafter, these mutants are named by a three-letter code corresponding to the  
144 residues found at position 469, 595 and 622 (where K was replaced by either R or A) or 471,  
145 597 and 624 (where E or D were replaced by Q or N, respectively). The simultaneous K<sub>595</sub>A  
146 and K<sub>622</sub>R changes (yielding the **KAR** variant, where K at position 469 is intact) prevented the  
147 formation of the ~100 kDa band seen with WT SAMHD1 and likely representing a mono-  
148 SUMOylated form (**Fig. 2C**, lanes 2 and 3). This observation suggested that K595 and/or

149 K622 are modified by a single SUMO moiety. Consistently, the mono-SUMOylated SAMHD1  
150 form was detected only when the SUMO site centered on either K595 or K622 was intact  
151 (corresponding to mutants **RKR** and **QEN** or **RAK**, respectively), although to a weaker extent  
152 relative to the WT protein (**Fig. 2B**, compare lanes 2 and 4, and lanes 7 and 8 to 6). We also  
153 analyzed the SUMOylation profile of SAMHD1 double mutants upon MG132 treatment. The  
154 **KAR** and **RAK** variants, where K469 or K622 is intact, respectively, displayed an altered  
155 polySUMOylation pattern as compared to WT SAMHD1 (**Fig. S4B**, compare lanes 3 and 4 to  
156 2). Conversely, the simultaneous arginine substitution of K469 and K622 (yielding the **RKR**  
157 mutant) virtually abolished SAMHD1 polySUMOylation (**Fig. S4B**, compare lanes 7 and 8 to  
158 6). The concomitant E471Q and D624N changes (yielding the **QEN** mutant) had analogous  
159 consequences (**Fig. S4B**, compare lanes 6 and 8). These results indicate that K469 and  
160 K622, but not K595, are target sites for SUMO chains which accumulate upon MG132  
161 treatment. Finally, we established that inactivation of the three SUMO-acceptor sites of  
162 SAMHD1 (**RAR** and **QQN** variants) strongly hampered the formation of slow migrating bands  
163 when SUMOs were expressed either ectopically (**Fig. 2C and S4B**, lanes 9 and 10) or at  
164 endogenous levels (**Fig. 1B**, compare lanes 2 and 4). Overall, these results confirm that  
165 residues K469, K595 and K622 are the major SUMOylation sites of SAMHD1.

166

#### 167 **SAMHD1 mutants defective for K595 SUMOylation lose their HIV-1 restriction activity**

168 To assess the requirement of SUMO conjugation for viral restriction, we stably  
169 expressed WT or SUMOylation-site SAMHD1 mutants, in SAMHD1-negative monocytic  
170 U937 cells. Following cell differentiation by PMA treatment, all SAMHD1 mutants were  
171 enriched in the nucleus (**Fig. S5A**) and, except for the catalytic-defective variant (HD/AA),  
172 displayed WT-like expression levels (**Fig. S5B and S5C**). Next, we challenged the  
173 differentiated U937 cell lines with a VSVg-pseudotyped HIV-1 virus expressing *EGFP* as a  
174 reporter gene (VSVg/HIV-1 $\Delta$ Env*EGFP*) and quantified the fraction of infected cells 48 hours  
175 later by flow cytometry (**Fig. 3A**). As previously reported, expression of WT SAMHD1  
176 rendered U937 cells resistant to HIV-1 infection, while the HD/AA and phosphomimetic T<sub>592</sub>E  
177 mutants failed to do so (**Fig. 3B**). Simultaneous substitution of the three major SUMO-  
178 acceptor K residues into R also abrogated SAMHD1-mediated restriction (**RRR** mutant, **Fig.**  
179 **3B**). Similarly, preventing SUMOylation by mutation of the acidic amino acids within the  
180 corresponding SUMO consensus motifs rendered SAMHD1 restriction-defective (**QQN**  
181 mutant, **Fig. 3B**). These observations strongly indicate that the regulation of SAMHD1  
182 antiviral activity relies on SUMOylation, but not on other K-directed PTMs (i.e.  
183 ubiquitylation, acetylation). As SAMHD1 variants impaired for SUMO-conjugation to K469  
184 and/or K622 efficiently blocked HIV-1 infection (**RKR** and **QEN** mutants, **Fig. 3B** and **Fig.**  
185 **S5D**), we deduced that SUMOylation of K595 might be crucial for viral restriction by

186 SAMHD1. Consistent with this hypothesis, SAMHD1 mutants where K595 was changed into  
187 either A or R lacked antiviral activity (**Fig. 3C**). Importantly, substituting E597 with Q to  
188 prevent K595 SUMOylation had similar functional consequences (**Fig. 3C**). Of note, mutating  
189 the neighboring residue Q594 into N did not modify the restriction activity of SAMHD1 (**Fig.**  
190 **3C**).

191 To elucidate the possible mechanisms underlying the loss-of-restriction phenotype of  
192 SAMHD1 variants defective for K595 SUMOylation, we assessed their dNTPase activity by  
193 measuring cellular dNTP levels. The concentration of dATP and dGTP (representative of the  
194 four dNTPs) of differentiated U937 cells dropped ~20-fold upon expression of WT SAMHD1  
195 cells (**Fig. 3D** and **Fig. S5E**) reaching levels comparable to those of PMA-treated THP1 cells  
196 (**Fig. S9A**). The catalytic-defective HD/AA mutant did not alter the cellular dNTP content,  
197 while the phosphomimetic T<sub>592</sub>E variant was as potent as WT SAMHD1 (**Fig. 3D** and **Fig.**  
198 **S5E**), as previously shown<sup>8,18,24,25</sup>. Similarly, all the tested SUMOylation-deficient SAMHD1  
199 mutants reduced the cellular dNTP pools to a WT extent, indicating that their dNTPase  
200 activity is intact (**Fig. 3D** and **Fig. S5E**). These results indirectly demonstrate that the  
201 impaired antiviral function of SAMHD1 mutants lacking K595 SUMOylation is due to neither  
202 defective oligomerization nor improper folding. In conclusion, impairing SUMO conjugation to  
203 K595 compromises the antiviral activity of SAMHD1 but not its dNTPase function, a  
204 phenotype that mirrors the effects of the phosphomimetic T<sub>592</sub>E mutation.

205

#### 206 **Both K595 SUMOylation and viral restriction rely on the SIM2 motif**

207 *In silico* analysis of human SAMHD1 sequence with the bioinformatic predictor JASSA<sup>46</sup>  
208 highlighted the presence of three potential SIMs, suggesting that SAMHD1 could interact  
209 non-covalently with SUMO (**Fig. S6A**). SIM1 (<sub>62</sub>PVLL<sub>65</sub>) is located in the N-terminal SAM  
210 domain while SIM2 (<sub>488</sub>LLDV<sub>491</sub>) and SIM3 (spanning the overlapping <sub>499</sub>VDV<sub>501</sub> and  
211 <sub>500</sub>VDVI<sub>502</sub> sequences) are found in the C-terminal half of the protein (**Fig. 4A**). Protein  
212 sequence alignment revealed that SIM1 is present in SAMHD1 orthologs from Hominids,  
213 SIM2 also in Old-World Monkey isoforms, while SIM3 is highly conserved along evolution  
214 (**Fig. S3**). By mapping the position of the putative C-terminal SIMs on the crystal structure of  
215 the HD domain of SAMHD1, we found that SIM3 is buried within the globular fold of the  
216 protein, while SIM2 is surface-exposed and near the SUMOylatable K595 residue (**Fig. 4B**),  
217 making it a more favorable candidate for functional studies. We first established that  
218 endogenous SAMHD1 was enriched on beads coupled to SUMO1 and, to a greater extent,  
219 SUMO2, but not uncoupled beads incubated with the lysate of differentiated THP1 cells (**Fig.**  
220 **4C**). Next, we assessed the implication of SIM2 for the SAMHD1-SUMO binding. We found  
221 that mutating the LLDV sequence into AADA (yielding the SIM2m variant) resulted in a

222 weaker association between SAMHD1 and SUMO2 in both pull-down (**Fig. 4D**) and PLA  
223 tests (**Fig. S6B**).

224 The existence of a non-covalent interaction between SAMHD1 and SUMO mediated by  
225 SIM2 prompted us to investigate the possible implications for restriction using the U937 cell-  
226 based assay described above. Mutation of SIM2 rendered SAMHD1 unable to inhibit both  
227 HIV-1 (**Fig. 4E**) and HIV-2 $\Delta$ Vpx infection (**Fig. S7A**) without affecting its localization (**Fig.**  
228 **S6B**), expression levels (**Fig. S7B**) and capacity to reduce cellular dNTP concentrations  
229 (**Fig. S7C**). SIM2 is located near residue T592, which phosphorylation is recognized as a  
230 major regulator of SAMHD1 antiviral function<sup>17,18</sup>. Therefore, we used an anti-phospho-T592  
231 species-specific antibody to monitor the degree of modification of SAMHD1 SIM2m mutant  
232 expressed either stably in differentiated U937 cells or transiently in cycling 293T cells. In both  
233 cell types, SAMHD1 SIM2m variant was phosphorylated at levels comparable to that of WT  
234 SAMHD1 (**Fig. S7B and S7D**).

235 As mutation of either SIM2 or the adjacent SUMOylation motif harboring K595 abrogated  
236 SAMHD1 restriction activity, we postulated the existence of a functional connection between  
237 the two sites. Indeed, SIM2 might provide an extended binding interface that stabilizes the  
238 association between SAMHD1 and the SUMO-charged Ubc9 promoting the efficient transfer  
239 of SUMO to K595, which lies within a minimal SUMOylation site (KxE)<sup>34</sup>. By performing both  
240 immunoprecipitation and histidine affinity purification assays, we confirmed that the  
241 LLDV/AADA substitution virtually abolished SUMO conjugation to SAMHD1 RKR variant, as  
242 demonstrated by the loss of the ~100 kDa band corresponding to K595 SUMOylation (**Fig.**  
243 **4F**, compare lanes 2 and 3). Conversely, inactivation of SIM2 barely modified the conjugation  
244 profile of WT SAMHD1 in conditions of either ectopic (**Fig. S7E**, compare lanes 2 and 3) or  
245 endogenous expression of SUMO isoforms (**Fig. 1B**, compare lanes 2 and 3). In conclusion,  
246 the integrity of the surface-exposed SIM2 is essential for both SUMO conjugation to K595  
247 and viral restriction, providing converging evidence that human SAMHD1 requires K595  
248 SUMOylation to be restriction competent.

249

#### 250 **Modification of K595 by SUMO2 renders dephosphorylated SAMHD1 antivirally active**

251 SAMHD1 mutants defective for SUMO conjugation to K595 mirrored the loss-of-restriction  
252 phenotype of the phosphomimetic T<sub>592</sub>E variant, suggesting that SUMOylation and  
253 phosphorylation of these adjacent sites might interfere with each other. We reasoned that  
254 T592 phosphorylation might inhibit modification of K595 by SUMO either directly, by  
255 introducing a negative charge that generates an electrostatic repulsion, or indirectly, by  
256 modifying the conformation of the C-terminal region of SAMHD1 encompassing residues  
257 582-626<sup>23,47</sup>. The SUMOylation profile of the SAMHD1 RKR mutant was unaffected if T592  
258 was changed into A or E, to mimic the absence or presence of a phosphate group,



259 respectively (**Fig. S8A**). Therefore, the phosphorylation status of T592 does not seem to  
260 affect K595 SUMOylation.

261 We then analyzed the degree of phosphorylation of WT and SUMOylation-deficient  
262 SAMHD1 variants expressed in 293T cells using a phospho-T592 species-specific antibody.  
263 The E<sub>597</sub>Q change did not detectably modify the ratio of the phosphorylated relative to the  
264 total SAMHD1 levels, indicating that K595 SUMOylation is not a requirement for T592  
265 phosphorylation. We also observed that the Q<sub>594</sub>N and K<sub>595</sub>R substitution reduced T592  
266 phosphorylation by ~33 to 47%, respectively (**Fig. 5A**). Strikingly, the K<sub>595</sub>A mutation, which  
267 rendered SAMHD1 antivirally inactive (**Fig. 3C**), caused a ~94% drop in T592  
268 phosphorylation (**Fig. 5A**), likely due to the inactivation of the <sup>592</sup>TPQK<sup>595</sup> CDK-consensus  
269 sequence. We obtained similar results in differentiated U937 cells (**Fig. S8B**). Lack of T592  
270 phosphorylation upon replacing K595 with alanine was confirmed by comparing the  
271 electrophoretic mobility of WT and SUMOylation-deficient SAMHD1 variants in a Phos-tag  
272 gel, ruling out the possibility that amino acids changes near T592 had altered the binding  
273 affinity of the phospho-specific antibody (**Fig. 5B**). The absence of correlation between the  
274 status of phosphorylation and SUMOylation of SAMHD1 suggest that these PTMs are  
275 independent of one another. Importantly, these observations show for the first time that  
276 dephosphorylated T592 alone is insufficient to render SAMHD1 restriction competent. To  
277 substantiate further this conclusion, we generated U937 cell lines stably expressing  
278 SAMHD1 variants bearing the phospho-ablative T<sub>592</sub>A change alone or together with  
279 mutations disrupting SUMO conjugation to K595 (**Fig. S8C**) and tested their restriction  
280 activity. As previously reported<sup>17,18,23,48</sup>, SAMHD1 T<sub>592</sub>A mutant restricted HIV-1 to the same  
281 extent as its WT counterpart (**Fig. 5C**). Concomitant mutation of K595 rescued HIV-1  
282 infectivity to a moderate but statistically significant extent (**Fig. 5C**), a phenotype that might  
283 be attributed to the transfer of SUMO to an adjacent site (i.e. K596). The E<sub>597</sub>Q change had a  
284 stronger effect, turning the constitutive-active SAMHD1 T<sub>592</sub>A variant into a restriction-  
285 defective protein (**Fig. 5C**).

286 Previous studies showed that the deletion of the C-terminal tail (aa 595-626, SAMHD1 $\Delta$ C)  
287 renders SAMHD1 restriction-defective<sup>23,49</sup>. To exclude that mutation of T592 together with  
288 K595 or E597 might had altered this functionally important region of SAMHD1, we  
289 engineered two fusion proteins where either the SUMO1 or the SUMO2 sequence was  
290 inserted in-frame at the C-terminus of the SAMHD1 $\Delta$ C truncation mutant to mimic a  
291 constitutively SUMOylated form. We reasoned that, if the defect was due to lack of K595  
292 SUMOylation, the SUMO-fusion should compensate for the loss of function of the  
293 SAMHD1 $\Delta$ C mutant, as reported for CtIP-dependent DNA resection activity<sup>50</sup>. Using the  
294 U937-cell based restriction assay we confirmed that SAMHD1 $\Delta$ C was unable to inhibit HIV-1  
295 infection (**Fig. 5D**). Importantly, fusion of SUMO2, but not SUMO1, to SAMHD1 $\Delta$ C fully

296 restored viral restriction (**Fig. 5D**), with no detectable change of the protein expression levels  
297 (**Fig. S8D**). Collectively, our data demonstrate that, in non-cycling cells where the bulk of  
298 SAMHD1 harbors dephosphorylated T592, SUMOylation of K595 is required for viral  
299 restriction.

300

### 301 **Infectivity of SAMHD1-sensitive viruses raises upon SUMOylation inhibition in** 302 **macrophages**

303 Having shown that SUMOylation of the conserved K595 residue regulates the antiviral  
304 activity of SAMHD1 stably expressed in U937 cells, we undertook a drug-based approach to  
305 validate this finding on endogenous SAMHD1-expressing cells. We therefore exposed  
306 undifferentiated or PMA-treated THP1 cells to GA or AA, to suppress the activity of the E1  
307 SUMO-activating enzyme<sup>42</sup> and hinder the SAMHD1-SUMO association (**Fig 1D**), before  
308 challenge with the VSVg/HIV-1 $\Delta$ Env*EGFP* virus. Cycling THP1 cells were readily permissive  
309 to HIV-1 and inhibition of SUMOylation did not alter this state (**Fig. 6A**), indirectly  
310 demonstrating that cell viability was not affected. The percentage of HIV-1-positive cells  
311 sharply decreased (~15-fold) following differentiation and was rescued to a moderate (~1.7 to  
312 2-fold) but statistically significant extent by blocking the SUMO pathway (**Fig. 6A**). This effect  
313 was neither due to altered SAMHD1 localization (**Fig. 1D**) and expression (**Fig. S1**), nor  
314 changes in the dNTP concentrations (**Fig. S9A**). The implication of the SUMOylation process  
315 in the antiviral mechanism of SAMHD1 was further substantiated by finding that treatment  
316 with GA increased ~2.5-fold the permissiveness of differentiated THP1 cells to HIV-2 $\Delta$ Vpx  
317 without affecting the infectivity of the corresponding WT virus (**Fig. 6B**).

318 Finally, we investigated the outcome of GA treatment on the spread of the replication-  
319 competent HIV-1 AD8 macrophage-tropic virus in primary monocyte-derived macrophages  
320 (MDMs). Inhibition of SUMOylation enhanced the magnitude of HIV-1 viral particle release in  
321 cultures of MDMs from 3 different donors, although to a various degree (**Fig. 6C** and **S9B**).  
322 Similar results were recapitulated upon infection of induced-pluripotent stem cells (iPSc)-  
323 derived macrophages (**Fig. S9C**). Altogether, these observations confirm that the  
324 maintenance of a SAMHD1-dependent antiviral state in macrophages relies on a functional  
325 SUMO system.

326

### 327 **Discussion**

328 It is widely accepted that the antiviral activity of SAMHD1 is downregulated by  
329 phosphorylation of residue T592 in actively dividing cells. Yet, T592 phosphorylation does not  
330 influence the dNTPase function, which is a central element of the restriction mechanism  
331 mediated by SAMHD1, implying that additional activities and/or regulations are at play. In this  
332 study, we show that SAMHD1 is SUMOylated and provide several lines of evidence that this

333 modification critically regulates its antiviral activity in non-cycling immune cells. Indeed, we  
334 demonstrate that SAMHD1 is conjugated by the three SUMO paralogs, expressed either  
335 ectopically or at endogenous levels, in cycling cells. Combining biochemical and imaging  
336 approaches, we also show that modification of SAMHD1 by SUMOs occurs in the nucleus of  
337 differentiated cells of myeloid origin, where its antiviral function is witnessed. Next, we  
338 identify residues K469, K595 and K622 as the major SUMO-attachment sites of SAMHD1.  
339 Still, we cannot exclude that additional sites might be SUMOylated at a low level or under  
340 specific circumstances (**Table S1**). By comparing the SUMO modification profile of SAMHD1  
341 variants, where these amino acids were mutated in various combinations, we found that  
342 K595 and K622 undergo mono-SUMOylation, while K469 and K622 are targeted by SUMO  
343 chains, which accumulate upon inhibition of the proteasome (**Fig. 7A**). Recently,  
344 ubiquitination of K622 mediated by TRIM21, which belongs to a protein family comprising  
345 ligases with dual SUMO and Ubiquitin E3 activity<sup>51</sup>, was proposed to promote proteasomal  
346 degradation of SAMHD1 in enterovirus-infected cells<sup>52</sup>. Whether Ubiquitination and  
347 SUMOylation of the same site cooperate to regulate the fate of SAMHD1 remains open for  
348 future studies. We also discovered that SUMOylation of K595, which is embedded within a  
349 minimal SUMO-consensus motif (KxE), relies on the integrity of a proximal SIM (named  
350 SIM2, aa 488-491). The presence of a SIM might contribute to an efficient recruitment of the  
351 SUMO-charged Ubc9, thereby promoting SUMOylation of the adjacent K595 residue<sup>34</sup>. By  
352 mediating a preferential non-covalent interaction between SAMHD1 and SUMO2 (**Fig. 4C**),  
353 SIM2 might also dictate the selective modification of K595 by this paralog which is needed  
354 for viral restriction (**Fig. 5D**).

355 By interrogating the ability of SUMOylation-deficient SAMHD1 variants to inhibit HIV-1, we  
356 found that simultaneous mutation of the three SUMO-acceptor K residues abolishes viral  
357 restriction. The same was observed upon substitution of the acidic amino acids within the  
358 corresponding SUMO-consensus motifs, to prevent the recruitment of the SUMOylation  
359 machinery<sup>36,37</sup>, strongly supporting the implication of SUMO conjugation, but not other K-  
360 directed PTMs, for the antiviral function. Further investigations showed that inactivation of the  
361 SUMO-consensus site harboring K595 alone recapitulates the loss-of-restriction phenotype.  
362 Similarly, mutation of SIM2, which hampers SUMOylation of K595 (**Fig. 4F**), renders  
363 SAMHD1 unable to restrict both HIV-1 and HIV-2 $\Delta$ Vpx. These results provide converging  
364 evidence that viral restriction relies on SUMOylation of K595, while modification of K469 and  
365 K622 by SUMO is dispensable.

366 In a complementary approach, we assessed whether small molecule SUMOylation  
367 inhibitors, which weakened the SAMHD1-SUMO interaction (**Fig. 1D**), might relieve the  
368 restriction activity of endogenous SAMHD1 and promote infection. Blocking SUMOylation  
369 enhanced the cell permissiveness to infection in contexts where SAMHD1 was antivirally

370 active (differentiated THP1 cells infected by either HIV-1 or HIV-2 $\Delta$ Vpx), but not when its  
371 function was suppressed by either T592 phosphorylation (dividing THP1 cells, HIV-1  
372 infection) or Vpx-mediated degradation (differentiated THP1 cells, infection by HIV-2).  
373 Importantly, inhibiting SUMOylation favored the spreading of a replication-competent HIV-1  
374 virus in cultures of primary human MDMs indicating, on the side, that the observed effects  
375 are independent on the viral entry pathway. These results support the implication of  
376 SUMOylation in the antiviral response mediated by SAMHD1.

377 Several data indicate that the restriction mechanism of SAMHD1 is tightly connected to its  
378 ability to limit the dNTP supply for viral genome replication<sup>4,8,23</sup>. However, all the  
379 SUMOylation-defective mutants tested in this study (including K<sub>595</sub>A, K<sub>595</sub>R, E<sub>597</sub>Q and  
380 SIM2m) were as potent as WT SAMHD1 in reducing the cellular dNTP concentrations. Along  
381 this line, SUMOylation inhibitors increased the permissiveness of macrophages to SAMHD1-  
382 sensitive viruses without altering the cellular dNTP levels. We concluded that SUMO  
383 conjugation does not influence the ability of SAMHD1 to hydrolyze dNTPs in cells. The  
384 possibility to uncouple the modulation of the dNTP pools and the antiviral function, which was  
385 previously described for the phosphomimetic T<sub>592</sub>E<sup>17,18,24,25</sup> and the redox-insensitive C<sub>522</sub>S<sup>53</sup>  
386 variants, strongly indicates that SAMHD1 possesses additional dNTPase-independent  
387 properties contributing to the viral restriction mechanism, which await identification.

388 The covalent attachment of SUMO to K595 might directly stimulate another enzymatic  
389 function of SAMHD1 relevant for virus restriction, i.e. the debated RNase activity<sup>24,28,29,54</sup>.  
390 Nevertheless, SUMOylation generally occurs at a low stoichiometry (often less than 1%<sup>55</sup>),  
391 which makes it difficult to envision how preventing the modification of a tiny proportion of  
392 SAMHD1 could account for the dramatic restriction defect that we observed. Notably, the  
393 ability of SAMHD1 to interact with the viral genome<sup>27</sup> could favor SUMOylation, as reported  
394 for PCNA<sup>56</sup> and PARP-1<sup>57</sup>, and influence, in turn, its SUMO-dependent antiviral functions.  
395 Another major consequence of SUMOylation is the formation of new binding interfaces,  
396 leading to the notion that SUMO acts as a “molecular glue” between its substrate and a SIM-  
397 containing partner, which otherwise display weak affinity<sup>58</sup>. Thus, we speculate that  
398 SUMOylation of K595 might stimulate the recruitment of cellular and/or viral cofactors via  
399 their SIM, bringing about the formation of a complex endowed with antiviral activity.  
400 Phosphorylation of T592 might interfere with the assembly of such a complex. In an  
401 alternative scenario, SUMO as a bulky modifier might abrogate the association between  
402 SAMHD1 and an inhibitor keeping it in an antivirally inactive state. Further investigation is  
403 warranted to investigate these hypotheses.

404 The analogous restriction phenotype of SAMHD1 variants harboring mutations that either  
405 mimic a constitutively phosphorylated T592 or impair SUMO conjugation to K595 raised the  
406 possibility that these PTMs might be co-regulated. However, the lack of correlation between

407 the phosphorylation and the SUMOylation status of SAMHD1 suggests that these PTMs are  
408 independent events. On one hand, this implies that phosphorylation of T592, which is  
409 important for replication fork progression and resection of collapsed forks<sup>21</sup>, abolishes the  
410 restriction activity of SAMHD1 in cycling cells, irrespective of whether K595 is SUMOylated  
411 or not (**Fig. 7B**). On the other hand, our results support a model according to which K595  
412 SUMOylation defines the subpopulation of restriction-competent SAMHD1 in non-cycling  
413 immune cells, where the bulk of the protein harbors a dephosphorylated T592 residue. First,  
414 we found that SAMHD1 K<sub>595</sub>A mutant displayed a severe phosphorylation deficiency, possibly  
415 because the CDK-consensus driving T592 phosphorylation is disrupted<sup>43</sup>. As SAMHD1 K<sub>595</sub>A  
416 variant lacked restriction activity, these data indicate that dephosphorylated T592 alone  
417 cannot overcome the defect imposed by the absence of K595 SUMOylation (**Fig. 7B**).  
418 Second, we confirmed that the K<sub>595</sub>R or E<sub>597</sub>Q change, which inhibit SUMO attachment to  
419 K595, converted the constitutively active SAMHD1 T<sub>592</sub>A variant into a restriction-defective  
420 protein. Third, we found that the restriction activity of the SAMHD1 $\Delta$ C mutant (lacking aa  
421 595-626) was fully rescued upon fusion with SUMO2. Conversely, SUMO1 had only a mild  
422 effect, despite ~50% sequence homology with its paralog<sup>35</sup>. These isoform-specific effects  
423 are intriguing since SAMHD1 displays a preferential non-covalent interaction with SUMO2  
424 rather than SUMO1 (**Fig. 4C**). Moreover, it should be noted the fraction of SUMO2/3  
425 available for conjugation is larger than that of SUMO1, which is mostly conjugated to high-  
426 affinity targets (i.e. RanGAP1), and can further raise in response to various stimuli including  
427 viral and bacterial infection<sup>33,44,59</sup>.

428 In conclusion, our results unravel that the regulation of the antiviral function of SAMHD1  
429 depending on the cell cycle status of the infected cell is more complex than previously  
430 anticipated and point to a scenario where phosphorylation of T592 and SUMOylation of K595  
431 provide a sophisticated mechanism controlling a dNTPase-independent component of the  
432 restriction activity. These findings not only open a new perspective to uncover the enigmatic  
433 aspects of SAMHD1-mediated viral restriction, but also provide opportunities for the  
434 development of strategies aiming to selectively manipulate the immune function of SAMHD1  
435 without affecting activities important for cell homeostasis.

436

## 437 **Methods**

438 **Cells and reagents.** Human Embryonic Kidney (HEK) 293T cells were cultured in DMEM  
439 (Invitrogen). The human monocytic U937 and THP1 cell lines were grown in RPMI  
440 (Invitrogen). Media were supplemented with 10% fetal calf serum (Invitrogen) and  
441 penicillin/streptomycin (100 U/mL). U937 and THP1 cell lines were differentiated by  
442 treatment with phorbol-12-myristate-13-acetate (PMA, Sigma-Aldrich) (100 to 300 ng/mL,  
443 24h). All cell lines were tested mycoplasma-free (Mycoplasmacheck, GATC Biotech). Buffy

444 coats from human healthy donors were obtained from the “Etablissement Français du Sang”.  
445 Monocytes were isolated using a CD14+ selection kit (Miltenyi Biotech) and cultured 12 days  
446 in DMEM supplemented with 10% Human Serum (inactivated) to generate MDMs. Antibodies  
447 used are the following: mouse anti-HA11 (Covance), sheep anti-SUMO1 (Enzo), rabbit anti-  
448 SUMO1, rabbit anti-SUMO2/3, mouse anti-SAMHD1, anti-HA HRP (Abcam), rabbit anti-  
449 pT592-SAMHD1 (Cell Signaling), rabbit anti-actin, anti-Flag HRP (Sigma-Aldrich), anti-HA  
450 HRP (Roche).

451

452 **Plasmid construction and mutagenesis.** pMD2.G encodes the VSVg envelope protein and  
453 psPAX2 is a second-generation HIV-1-based packaging plasmid (a gift from D. Trono). pNL4-  
454 3EnvFsGFP contains a complete HIV-1 provirus with an *env*-inactivating mutation and *EGFP*  
455 inserted in the place of the Nef-coding gene (a gift from D. Gabuzda)<sup>60</sup>. HIV-2 ROD9Δenv-  
456 GFP (WT or ΔVpx) was described previously<sup>61</sup>. HIV<sup>NLAD8</sup> is a macrophage (CCR5) tropic HIV-  
457 1 derivative of pNL4-3 containing the ADA envelope<sup>62</sup>. His-SUMO1, 2 and 3 were already  
458 described<sup>63</sup>. pLenti-puro construct expressing N-terminal HA-tagged human SAMHD1 was  
459 described previously<sup>8</sup> and was used as template to generate mutants using the Q5® Site-  
460 Directed Mutagenesis Kit according to the manufacturer’s instructions (NEB). To obtain the  
461 SAMHD1ΔC-SUMO fusion proteins, a Sall site was inserted at position 1791 in the coding  
462 sequence of SAMHD1 (between K596 and E597). The ORF encoding SUMO1 or SUMO2  
463 flanked by XhoI and Sall sites was amplified by PCR and then inserted by ligation into the  
464 modified vector digested by Sall. The C-terminal GG motif of SUMOs was mutated into AA to  
465 prevent conjugation. The entire coding fragment was confirmed by sequencing (GATC  
466 Biotech).

467

468 **Virus stock production, infection assay, stable cell lines.** Single-round viruses were  
469 produced by co-transfection of 293T cells using a standard calcium phosphate precipitation  
470 technique with the pNL4-3EnvFsGFP or HIV-2 ROD9ΔenvGFP plasmids and a VSVg-  
471 expression vector (pMD2.G) at a 20:1 ratio. Supernatants were collected 48h post-  
472 transfection, clarified by centrifugation, filtered through 45 μm-pore size filters and  
473 concentrated onto a 20% sucrose cushion by ultracentrifugation (24,000 rpm, 2h, 6°C) using  
474 a SW32 rotor (Beckman). HIV-1-based lentiviral particles were produced by co-transfecting  
475 293T cells with packaging (psPAX2), VSVg-expressing (pMD2.G) and vector plasmids at a  
476 4:1:5 ratio. Stable U937 cell lines were subject to puromycin selection (4 μg/mL, 6 days).  
477 Infection assays were conducted in a 12-well plate (0.3x10<sup>6</sup> cells/well) in 3 to 4 technical  
478 replicates and the percentage of GFP-expressing cells was quantified after 24 or 48 hours on  
479 a FORTRESSA flow cytometer using a BD FACS DIVA software (BD Biosciences). Inocula  
480 were adjusted to yield ~30% GFP-positive PMA-treated U937 cells, corresponding to a

481 theoretical multiplicity of infection (moi) of 0.3. MDMs were seeded in flat-bottomed 96-well  
482 plates at  $1 \times 10^6$  cells per well. Following incubation with GA (2h) cells were infected with  
483 HIV<sup>NLAD8</sup> (10ng/mL), and the viral p24 antigen released in the supernatant was quantified at  
484 day 4, 6 and 9 post-infection.

485

486 **Denaturing purification on Ni-NTA beads and immunoprecipitation assays.** 293T cells  
487 ( $3 \times 10^6$  cells/10-cm dish) were transfected using a calcium phosphate precipitation technique  
488 with plasmids encoding HA-tagged WT or mutant SAMHD1 proteins, Ubc9 and each SUMO  
489 paralog bearing an N-terminal 6-His tag or an appropriate empty plasmid. When required,  
490 cells were treated with MG132 overnight (ON, 3  $\mu$ M, Merck). Cells were lysed in ice-cold  
491 RIPA buffer (150mM NaCl, 0,4% NaDOC, 1% IGEPAL CA-630, 50mM Tris HCl pH 7.5, 5mM  
492 EDTA, 10mM NEM, 1mM DTT, proteases cocktail inhibitors) supplemented with 1% SDS  
493 and 1% TritonX-100. Following dilution 1:5 in RIPA buffer, lysates were incubated on HA-Tag  
494 affinity matrix beads (Pierce<sup>TM</sup>) (ON, RT). Alternatively, cells were lysed in buffer A (6M  
495 guanidium-HCl, 0.1M Na<sub>2</sub>HPO<sub>4</sub>/NaH<sub>2</sub>PO<sub>4</sub>, 10mM imidazole, pH 8.0) and sonicated with a  
496 Bioruptor<sup>TM</sup> (Diagenode) (10 cycles, 45'' pulse, 20'' pause) before incubation with Nickel-  
497 Nitrilotriacetic (Ni-NTA) agarose beads (QIAGEN) (3h, RT). Following extensive washing with  
498 decreasing concentrations of guanidium-HCl, bound proteins were eluted by boiling in  
499 Laemmli buffer supplemented with 200 mM imidazole. For IP assays in native conditions,  
500 cells were lysed in ice-cold buffer (150 mM Tris HCl pH 8.0, 150 mM NaCl, 1% Triton,  
501 proteases cocktail inhibitors) and sonicated. Pre-cleared cell lysates were incubated with  
502 agarose beads coupled with either Human recombinant SUMO-1 or SUMO-2 (Enzo) (ON,  
503 4°C). Following extensive washing in lysis buffer, bound proteins were eluted by boiling in  
504 Laemmli buffer.

505

506 **Total protein quantification and immunoblotting.** The total protein concentration was  
507 determined by Lowry's method using the DC Protein Assay Kit, according to the  
508 manufacturer's instructions (Bio-Rad) with serial dilution series of Bovine Serum Albumin  
509 (BSA, Sigma) used as calibration standard. The optical density was measured at 750 nm  
510 using a plate reader (Berthold) with MikroWin 2010 software. Proteins contained in the whole  
511 cell lysate (WCL) or the eluates were separated on a 4-15% gradient sodium dodecylsulfate-  
512 polyacrylamide gel electrophoresis (SDS-PAGE) pre-casted gel (Bio-Rad). For Mn<sup>2+</sup>-Phos-  
513 tag SDS-PAGE gel, the acrylamide-pendant Phos-tag ligand (50  $\mu$ M, Phos-tag<sup>TM</sup> Acrylamide,  
514 FUJIFILM Wako Chemicals USA Corporation) and MnCl<sub>2</sub> (100 mM) were added to the 7%  
515 separating gel before polymerization. The Phos-tag gel was soaked in a transfer buffer  
516 containing 5 mM EDTA (10 min x 3) followed by washing in a transfer buffer without EDTA  
517 (20 min). Proteins were transferred on a nitrocellulose membrane and then detected with

518 appropriated antibodies. Immune-complexes were revealed with HRP-conjugated secondary  
519 antibodies and enhanced chemoluminescence (Pierce™ ECL Western Blotting Substrate).

520

521 **Immunofluorescence, in situ proximity ligation assays (Duolink), and confocal**  
522 **microscopy.** Cells seeded into 8-chamber culture slides (Nunc™ Lab-Tek™ II Chamber  
523 Slide™ System, ThermoFisher Scientific) ( $0.4 \times 10^6$  cells/well) were fixed (4%  
524 paraformaldehyde/PBS, 15', 4°C), permeabilized (0.1% PBS-Triton, 20', 4°C), quenched  
525 (125 mM glycine) and incubated with primary antibodies (ON, 4°C) diluted in blocking buffer  
526 (5% BSA, 0.1% PBS-Tween20), followed by secondary antibody coupled to Alexa<sub>594</sub> or  
527 Alexa<sub>488</sub> dye (1h, RT). Protein-protein interactions *in situ* were visualized using the Duolink®  
528 in situ proximity ligation assay (PLA) system (Sigma-Aldrich) according to the manufacturer's  
529 instructions. Images were acquired using a laser-scanning confocal microscope (LSM510  
530 Meta, Carl Zeiss) equipped with an Axiovert 200M inverted microscope, using a Plan Apo  
531 63/1.4-N oil immersion objective and analyzed with the imaging software Icy. The number of  
532 PLA foci per cell was scored manually using the same thresholding parameters across  
533 parallel samples.

534

535 **Cellular dNTPs quantification by primer extension assay.** Differentiated THP1 or U937  
536 cell lines were harvested in ice-cold 65% methanol, lysed (95°C, 3') and dried using a  
537 vacuum concentrator. Dried samples were analyzed for dNTP content were quantified by  
538 single nucleotide incorporation assay as described previously<sup>9</sup>.

539

540 **Statistical analyses.** Graphical representation and statistical analyses were performed  
541 using Prism7 software (GraphPad Software, San Diego, CA, USA). Unless otherwise stated,  
542 statistical significance was determined by one-way ANOVA test with a Dunnett's multiple  
543 comparison post-test.

544

545 **Data availability.** All data are available from the corresponding author upon request.

546

## 547 **References**

- 548 1. Baldauf, H.-M. *et al.* SAMHD1 restricts HIV-1 infection in resting CD4+ T cells. *Nat.*  
549 *Med.* **18**, 1682–9 (2012).
- 550 2. Descours, B. *et al.* SAMHD1 restricts HIV-1 reverse transcription in quiescent CD4+ T-  
551 cells. *Retrovirology* **9**, 87 (2012).
- 552 3. Hrecka, K. *et al.* Vpx relieves inhibition of HIV-1 infection of macrophages mediated by  
553 the SAMHD1 protein. *Nature* **474**, 658–61 (2011).
- 554 4. Laguette, N. *et al.* SAMHD1 is the dendritic- and myeloid-cell-specific HIV-1 restriction  
555 factor counteracted by Vpx. *Nature* **474**, 654–7 (2011).
- 556 5. Berger, A. *et al.* SAMHD1-deficient CD14+ cells from individuals with Aicardi-  
557 Goutières syndrome are highly susceptible to HIV-1 infection. *PLoS Pathog.* **7**, 1–12



- 558 (2011).
- 559 6. Goldstone, D. C. *et al.* HIV-1 restriction factor SAMHD1 is a deoxynucleoside  
560 triphosphate triphosphohydrolase. *Nature* **480**, 379–382 (2011).
- 561 7. Powell, R. D., Holland, P. J., Hollis, T. & Perrino, F. W. Aicardi-Goutieres syndrome  
562 gene and HIV-1 restriction factor SAMHD1 is a dGTP-regulated deoxynucleotide  
563 triphosphohydrolase. *J. Biol. Chem.* **286**, 43596–600 (2011).
- 564 8. Lahouassa, H. *et al.* SAMHD1 restricts the replication of human immunodeficiency  
565 virus type 1 by depleting the intracellular pool of deoxynucleoside triphosphates. *Nat.*  
566 *Immunol.* **13**, 223–8 (2012).
- 567 9. Diamond, T. L. *et al.* Macrophage tropism of HIV-1 depends on efficient cellular dNTP  
568 utilization by reverse transcriptase. *J. Biol. Chem.* **279**, 51545–53 (2004).
- 569 10. Amie, S. M., Noble, E. & Kim, B. Intracellular nucleotide levels and the control of  
570 retroviral infections. *Virology* **436**, 247–254 (2013).
- 571 11. Lim, E. S. S. *et al.* The ability of primate lentiviruses to degrade the monocyte  
572 restriction factor SAMHD1 preceded the birth of the viral accessory protein Vpx. *Cell*  
573 *Host Microbe* **11**, 194–204 (2012).
- 574 12. Goujon, C. *et al.* SIVSM/HIV-2 Vpx proteins promote retroviral escape from a  
575 proteasome-dependent restriction pathway present in human dendritic cells.  
576 *Retrovirology* **4**, 2 (2007).
- 577 13. Kim, B., Nguyen, L. A., Daddacha, W. & Hollenbaugh, J. A. Tight Interplay among  
578 SAMHD1 Protein Level, Cellular dNTP Levels, and HIV-1 Proviral DNA Synthesis  
579 Kinetics in Human Primary Monocyte-derived Macrophages. *J. Biol. Chem.* **287**,  
580 (2012).
- 581 14. Schmidt, S. *et al.* SAMHD1's protein expression profile in humans. *J. Leukoc. Biol.* **98**,  
582 5–14 (2015).
- 583 15. Franzolin, E. *et al.* The deoxynucleotide triphosphohydrolase SAMHD1 is a major  
584 regulator of DNA precursor pools in mammalian cells. *Proc. Natl. Acad. Sci.* **110**,  
585 14272–14277 (2013).
- 586 16. Cribier, A., Descours, B., Valadão, A., Laguette, N. & Benkirane, M. Phosphorylation  
587 of SAMHD1 by Cyclin A2/CDK1 Regulates Its Restriction Activity toward HIV-1. *Cell*  
588 *Rep.* **3**, 1036–1043 (2013).
- 589 17. Welbourn, S., Dutta, S. M., Semmes, O. J. & Strebel, K. Restriction of Virus Infection  
590 but Not Catalytic dNTPase Activity Is Regulated by Phosphorylation of SAMHD1. *J.*  
591 *Virol.* **87**, 11516–11524 (2013).
- 592 18. White, T. E. *et al.* The retroviral restriction ability of SAMHD1, but not its  
593 deoxynucleotide triphosphohydrolase activity, is regulated by phosphorylation. *Cell*  
594 *Host Microbe* **13**, 441–451 (2013).
- 595 19. Schott, K. *et al.* Dephosphorylation of the HIV-1 restriction factor SAMHD1 is mediated  
596 by PP2A-B55 $\alpha$  holoenzymes during mitotic exit. *Nat. Commun.* **9**, 2227 (2018).
- 597 20. Tramentozzi, E. *et al.* The dNTP triphosphohydrolase activity of SAMHD1 persists  
598 during S-phase when the enzyme is phosphorylated at T592. *Cell Cycle* **17**, 1102–  
599 1114 (2018).
- 600 21. Coquel, F. *et al.* SAMHD1 acts at stalled replication forks to prevent interferon  
601 induction. *Nature* **557**, 57–61 (2018).
- 602 22. Yan, J. *et al.* CyclinA2-Cyclin-dependent Kinase Regulates SAMHD1 Protein  
603 Phosphohydrolase Domain. *J. Biol. Chem.* **290**, 13279–13292 (2015).
- 604 23. Arnold, L. H. *et al.* Phospho-dependent Regulation of SAMHD1 Oligomerisation  
605 Couples Catalysis and Restriction. *PLoS Pathog.* **11**, 1–30 (2015).
- 606 24. Welbourn, S. & Strebel, K. Low dNTP levels are necessary but may not be sufficient  
607 for lentiviral restriction by SAMHD1. *Virology* **488**, 271–277 (2016).
- 608 25. Bhattacharya, A. *et al.* Effects of T592 phosphomimetic mutations on tetramer stability  
609 and dNTPase activity of SAMHD1 can not explain the retroviral restriction defect. *Sci.*  
610 *Rep.* **6**, 31353 (2016).
- 611 26. Antonucci, J. M., St Gelais, C. & Wu, L. The Dynamic Interplay between HIV-1,  
612 SAMHD1, and the Innate Antiviral Response. *Front. Immunol.* **8**, 1541 (2017).

- 613 27. Ryoo, J., Hwang, S.-Y., Choi, J., Oh, C. & Ahn, K. SAMHD1, the Aicardi-Goutières  
614 syndrome gene and retroviral restriction factor, is a phosphorolytic ribonuclease rather  
615 than a hydrolytic ribonuclease. *Biochem. Biophys. Res. Commun.* **477**, 1–5 (2016).
- 616 28. Ryoo, J. *et al.* The ribonuclease activity of SAMHD1 is required for HIV-1 restriction.  
617 *Nat. Med.* **20**, 936–41 (2014).
- 618 29. Seamon, K. J., Sun, Z., Shlyakhtenko, L. S., Lyubchenko, Y. L. & Stivers, J. T.  
619 SAMHD1 is a single-stranded nucleic acid binding protein with no active site-  
620 associated nuclease activity. *Nucleic Acids Res.* **43**, 6486–6499 (2015).
- 621 30. Seamon, K. J., Bumpus, N. N. & Stivers, J. T. Single-Stranded Nucleic Acids Bind to  
622 the Tetramer Interface of SAMHD1 and Prevent Formation of the Catalytic  
623 Homotetramer. *Biochemistry* **55**, 6087–6099 (2016).
- 624 31. Hendriks, I. A. & Vertegaal, A. C. O. A comprehensive compilation of SUMO  
625 proteomics. *Nat. Rev. Mol. Cell Biol.* **11**, 1630–1649 (2016).
- 626 32. Hendriks, I. A. *et al.* Site-specific characterization of endogenous SUMOylation across  
627 species and organs. *Nat. Commun.* **9**, 1–17 (2018).
- 628 33. Everett, R. D., Boutell, C. & Hale, B. G. Interplay between viruses and host  
629 sumoylation pathways. *Nat. Rev. Microbiol.* **11**, 400–11 (2013).
- 630 34. Pichler, A., Fatouros, C., Lee, H. & Eisenhardt, N. SUMO conjugation – a mechanistic  
631 view. *Biomol. Concepts* **8**, 13–36 (2017).
- 632 35. Lapenta, V. *et al.* SMT3A, a human homologue of the *S. cerevisiae* SMT3 gene, maps  
633 to chromosome 21qter and defines a novel gene family. *Genomics* **40**, 362–366  
634 (1997).
- 635 36. Sampson, D. A., Wang, M. & Matunis, M. J. The Small Ubiquitin-like Modifier-1  
636 (SUMO-1) Consensus Sequence Mediates Ubc9 Binding and is Essential for SUMO-1  
637 Modification. *J. Biol. Chem.* **276**, 21664–21669 (2001).
- 638 37. Rodriguez, M. S., Dargemont, C. & Hay, R. T. SUMO-1 Conjugation in Vivo Requires  
639 Both a Consensus Modification Motif and Nuclear Targeting. *J. Biol. Chem.* **276**,  
640 12654–12659 (2001).
- 641 38. Kerscher, O. SUMO junction-what's your function? New insights through SUMO-  
642 interacting motifs. *EMBO Rep.* **8**, 550–5 (2007).
- 643 39. Bailey, D. & O'Hare, P. Comparison of the SUMO1 and ubiquitin conjugation pathways  
644 during the inhibition of proteasome activity with evidence of SUMO1 recycling.  
645 *Biochem. J.* **392**, 271–281 (2005).
- 646 40. Ristic, M., Brockly, F., Piechaczyk, M. & Bossis, G. Detection of Protein–Protein  
647 Interactions and Posttranslational Modifications Using the Proximity Ligation Assay:  
648 Application to the Study of the SUMO Pathway. in *Methods in molecular biology*  
649 (*Clifton, N.J.*) vol. 1449 279–290 (2016).
- 650 41. Bagchi, S., Fredriksson, R. & Wallén-Mackenzie, Å. In Situ Proximity Ligation Assay  
651 (PLA). in *Methods in molecular biology (Clifton, N.J.)* vol. 1318 149–59 (2015).
- 652 42. Fukuda, I. *et al.* Ginkgolic Acid Inhibits Protein SUMOylation by Blocking Formation of  
653 the E1-SUMO Intermediate. *Chem. Biol.* **16**, 133–140 (2009).
- 654 43. Nigg, E. A. Targets of cyclin-dependent protein kinases. *Curr. Opin. Cell Biol.* **5**, 187–  
655 193 (1993).
- 656 44. Saitoh, H. & Hinchey, J. Functional heterogeneity of small ubiquitin-related protein  
657 modifiers SUMO-1 versus SUMO-2/3. *J. Biol. Chem.* **275**, 6252–6258 (2000).
- 658 45. Su, H.-L. & Li, S. S.-L. Molecular features of human ubiquitin-like SUMO genes and  
659 their encoded proteins. *Gene* **296**, 65–73 (2002).
- 660 46. Beauclair, G. *et al.* JASSA: A comprehensive tool for prediction of SUMOylation sites  
661 and SIMs. *Bioinformatics* **31**, 3483–3491 (2015).
- 662 47. Tang, C., Ji, X., Wu, L. & Xiong, Y. Impaired dNTPase activity of SAMHD1 by  
663 phosphomimetic mutation of Thr-592. *J. Biol. Chem.* **290**, 26352–26359 (2015).
- 664 48. St Gelais, C. *et al.* Identification of Cellular Proteins Interacting with the Retroviral  
665 Restriction Factor SAMHD1. *J. Virol.* **88**, 5834–5844 (2014).
- 666 49. Yan, J. *et al.* Tetramerization of SAMHD1 is required for biological activity and  
667 inhibition of HIV infection. *J. Biol. Chem.* **288**, 10406–10417 (2013).

- 668 50. Soria-Bretones, I. *et al.* DNA end resection requires constitutive sumoylation of CtIP  
669 by CBX4. *Nat. Commun.* **8**, (2017).
- 670 51. Chu, Y. & Yang, X. SUMO E3 ligase activity of TRIM proteins. *Oncogene* **30**, 1108–  
671 1116 (2011).
- 672 52. Li, Z. *et al.* TRIM 21-mediated proteasomal degradation of SAMHD 1 regulates its  
673 antiviral activity. *EMBO Rep.* **21**, 1–18 (2020).
- 674 53. Wang, Z. *et al.* Functionality of Redox-Active Cysteines Is Required for Restriction of  
675 Retroviral Replication by SAMHD1. *Cell Rep.* **24**, 815–823 (2018).
- 676 54. Antonucci, J. M. *et al.* SAMHD1-mediated HIV-1 restriction in cells does not involve  
677 ribonuclease activity. *Nat. Med.* **22**, 1072–1074 (2016).
- 678 55. Johnson, E. S. Protein modification by SUMO. *Annu. Rev. Biochem.* **73**, 355–82  
679 (2004).
- 680 56. Parker, J. L. *et al.* SUMO modification of PCNA is controlled by DNA. *EMBO J.* **27**,  
681 2422–2431 (2008).
- 682 57. Zilio, N. *et al.* DNA-dependent SUMO modification of PARP-1. *DNA Repair (Amst)*. **12**,  
683 761–773 (2013).
- 684 58. Jentsch, S. & Psakhye, I. Control of nuclear activities by substrate-selective and  
685 protein-group SUMOylation. *Annu. Rev. Genet.* **47**, 167–86 (2013).
- 686 59. Ribet, D. & Cossart, P. Ubiquitin, SUMO, and NEDD8: Key Targets of Bacterial  
687 Pathogens. *Trends Cell Biol.* **28**, 926–940 (2018).
- 688 60. He, J. *et al.* HIV-1 infection of microglia. *Nature* **385**, 645–649 (1997).
- 689 61. Manel, N. *et al.* A cryptic sensor for HIV-1 activates antiviral innate immunity in  
690 dendritic cells. *Nature*. **467**, 214–217 (2010).
- 691 62. Freed, E. O. & Martin, M. A. HIV-1 infection of non-dividing cells. *Nature* **369**, 107  
692 (1994).
- 693 63. Zamborlini, A. *et al.* Impairment of human immunodeficiency virus type-1 integrase  
694 SUMOylation correlates with an early replication defect. *J. Biol. Chem.* **286**, 21013–22  
695 (2011).
- 696 64. Corpet, F. Multiple sequence alignment with hierarchical clustering. *Methods* **12**,  
697 8235–8251 (1984).
- 698 65. Robert, X. & Gouet, P. Deciphering key features in protein structures with the new  
699 ENDscript server. *Nucleic Acids Res.* **42**, W320-4 (2014).

700

## 701 **Acknowledgements**

702 The authors thank H. de Thé and V. Lallemand-Breitenbach for discussion, A. Amara and X.  
703 Carnec for critical reading of the manuscript. The authors thank M. Benkirane (IGH,  
704 Montpellier, France), N. Manel (I. Curie, Paris, France) and A. Puissant (INSERM U944) for  
705 reagents. We are grateful to the Core facility of IRSL and Yasmine Khalil for technical  
706 support. This work was supported by Sidaction (grant 2018-1-AEQ-12075 to AZ),  
707 Sidaction/FRM (grant VIH2016126003 to AZ), EU FP7 [HEALTH-2012-INNOVATION-1  
708 ‘HIVINNOV’] (Grant no. 305137 to AS and AZ). CM was supported by fellowships from the  
709 French “Ministère de la Recherche et de l’Innovation” and Sidaction. Some experiments were  
710 performed in the laboratory of B. Kim, supported by NIH grant AI136581 and AI150451 (to  
711 BK).

## 712 **Author contributions**

713 CM, AC, JTT, AZ conceived and performed most of the experiments; NP performed mutagenesis  
714 and cloning; NC, JB and OS planned and performed experiments on primary and iPS-derived

715 macrophages; SAC and BK provided dNTP measurements; MP and FDG contributed to the  
716 experiment of Fig. 3C; GB, LE, and FMG provided critical reagents; CM, AC, JTT, AS and AZ  
717 interpreted the data; CM, AC, JTT, AZ wrote the original draft; FMG, PL, AZ review and edited the  
718 manuscript; AZ supervised the study.

719 **Competing interests**

720 The authors declare no competing interests.

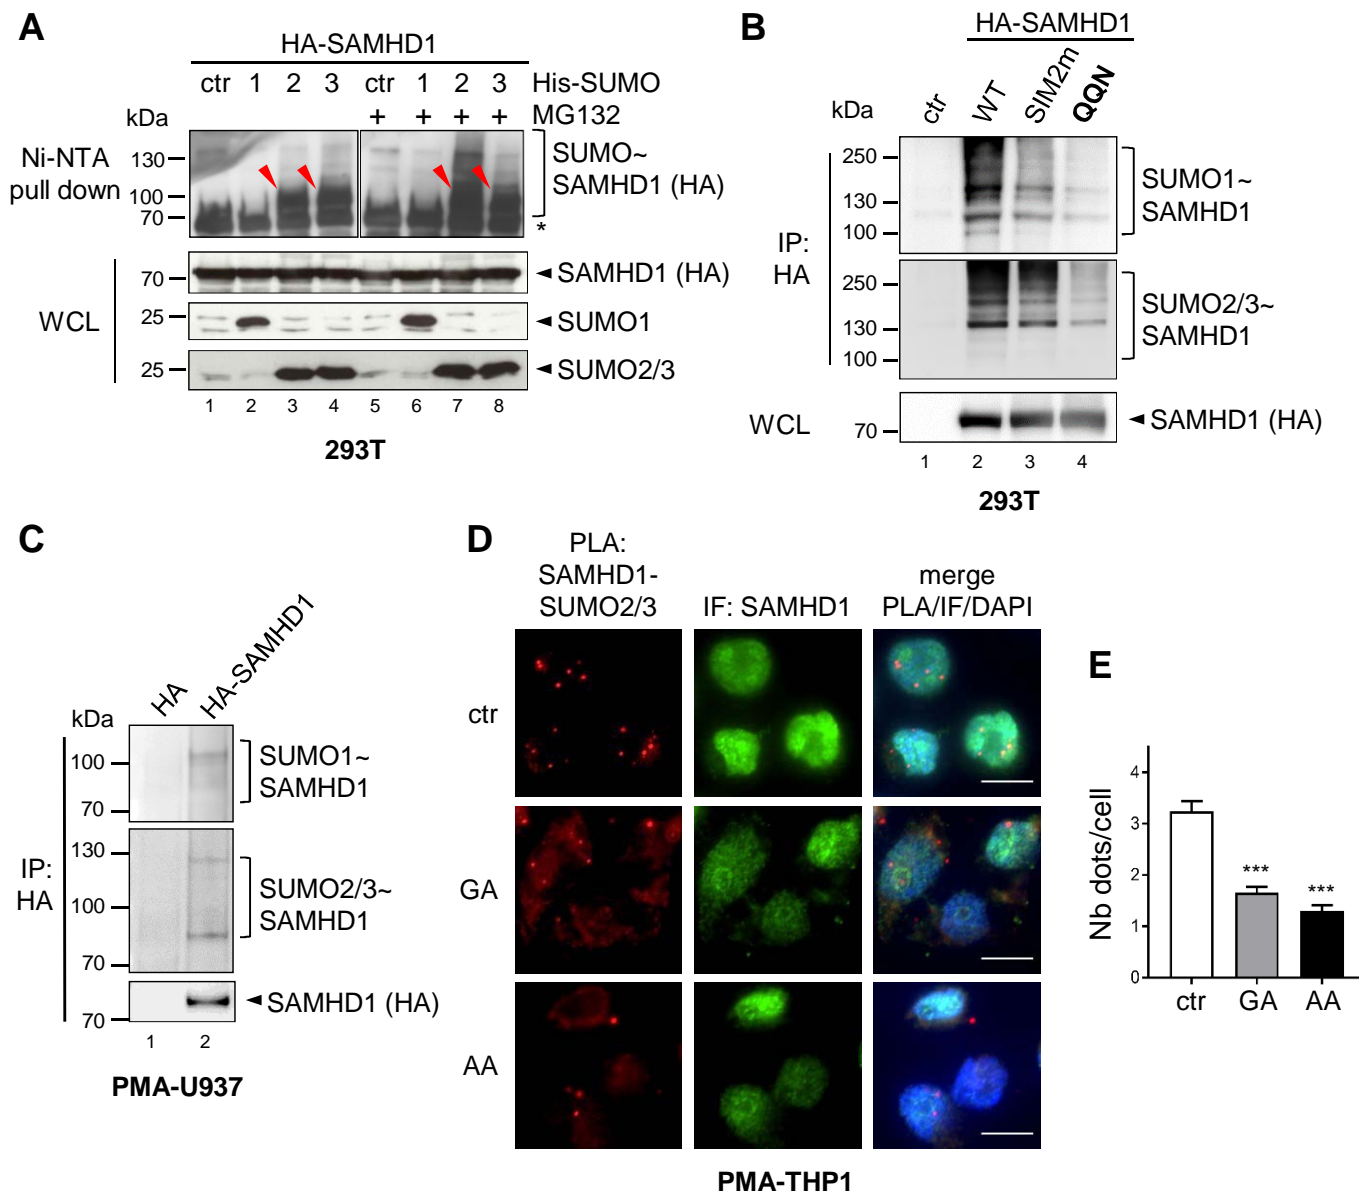

**Figure 1. SAMHD1 is SUMOylated both in dividing and non-dividing cells.** **A.** HEK 293T cells were transfected with plasmids encoding HA-SAMHD1 and N-terminal His-tagged SUMO1 (1), SUMO2 (2), SUMO3 (3) or the control empty plasmid (ctr). After 48 hours, cells were lysed in denaturing conditions (guanidium HCl 6M, imidazole 10 mM) to inhibit SUMO proteases, and SUMO-conjugates were enriched on Ni-NTA beads. Proteins contained in the eluates or the whole cell lysates (WCL) were separated on a 4-15% SDS-PAGE gel and detected by immunoblotting using anti-HA or anti-SUMO paralog specific antibodies. A representative result is shown (n=3). Arrowheads point to SAMHD1~SUMO conjugates. \*, nonspecific binding of unmodified SAMHD1 on Ni-NTA beads. **B.** HEK 293T cells transiently expressing HA-SAMHD1 WT or SUMOylation-deficient SIM2m and **QQN** variants were lysed in buffer containing 1% SDS. After dilution, SAMHD1 and its post-translational derivatives were immunoprecipitated on HA-matrix beads and analyzed as in A. A representative result is shown (n=2). **C.** U937 cells stably expressing HA-SAMHD1 or the empty vector control (HA) were induced to differentiate into macrophage-like cells by treatment with PMA (100 ng/mL, 24 h). SAMHD1 SUMOylation was assessed as in B. **D.** Differentiated THP-1 cells were incubated with ginkgolic acid (GA, 50µM), anacardic acid (AA, 50µM) or DMSO (ctr) for 2 hours. After fixation, cells were probed with anti-SAMHD1 and anti-SUMO2/3 antibodies before being processed for Proximity Ligation Assay (PLA panels, red dots). SAMHD1 localization was analyzed using an anti-isotype secondary antibody coupled to the Alexa<sub>488</sub> dye (IF panels, green). Nuclei were stained with DAPI. Scale bar = 10 µm. Representative images are shown (n=2). **E.** The PLA signal was quantified manually using the same thresholding parameters across parallel samples as defined with the Icy software. Bars represent the average number of dots per cell ±SD (n=150). Significance was determined by one-way ANOVA statistical test. \*\*\*: p < 0.001.

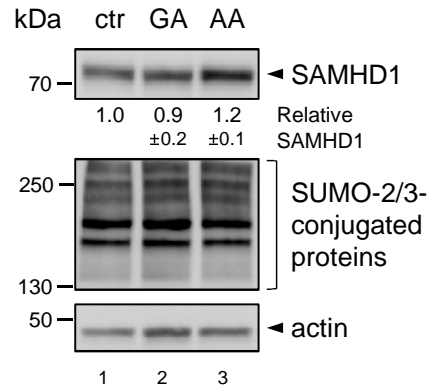

**Figure S1. Levels of SAMHD1 are unaffected by inhibition of SUMOylation (related to Fig. 1D and Fig. 6).** Proteins (20 µg total proteins/line) contained in the crude lysate of differentiated THP1 treated with GA or AA (50µM, 2h) or DMSO (ctr) were separated by migration on a 4-15% SDS-PAGE gel and, next, visualized by immunoblotting using antibodies against SAMHD1, SUMO2/3, or actin. The intensity of bands corresponding to SAMHD1 and actin, used as loading control, was determined by densitometry with ImageJ software (n=3). The SAMHD1/actin ratio in control cells was set to 1.

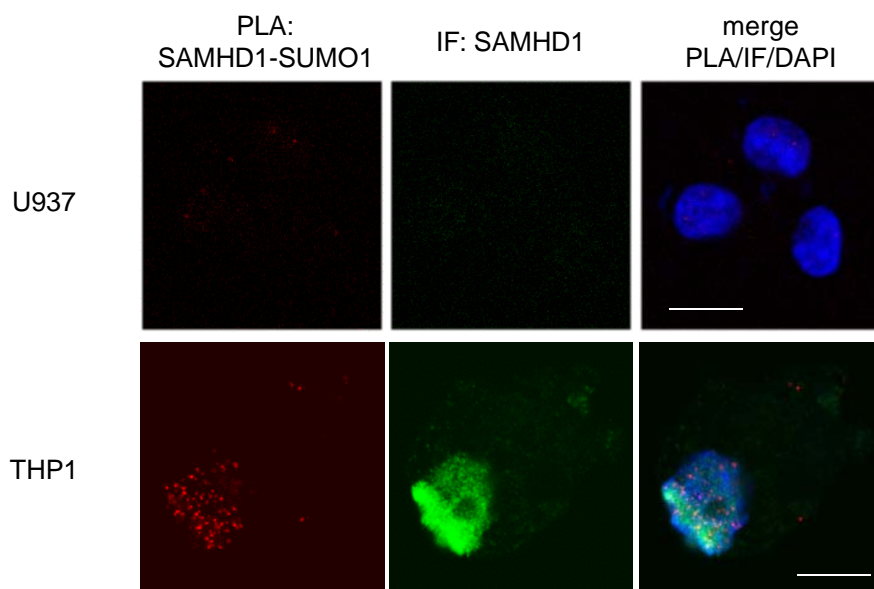

**Figure S2. SAMHD1 interacts with SUMO1 in the nucleus of differentiated THP1, but not U937 cells (related to Fig. 1D).** Differentiated THP1 or U937 cells were co-stained with anti-SAMHD1 and anti-SUMO1 antibodies and treated as in figure 1D. Data from one representative experiment are shown (n=2). Scale bar = 10  $\mu$ m.

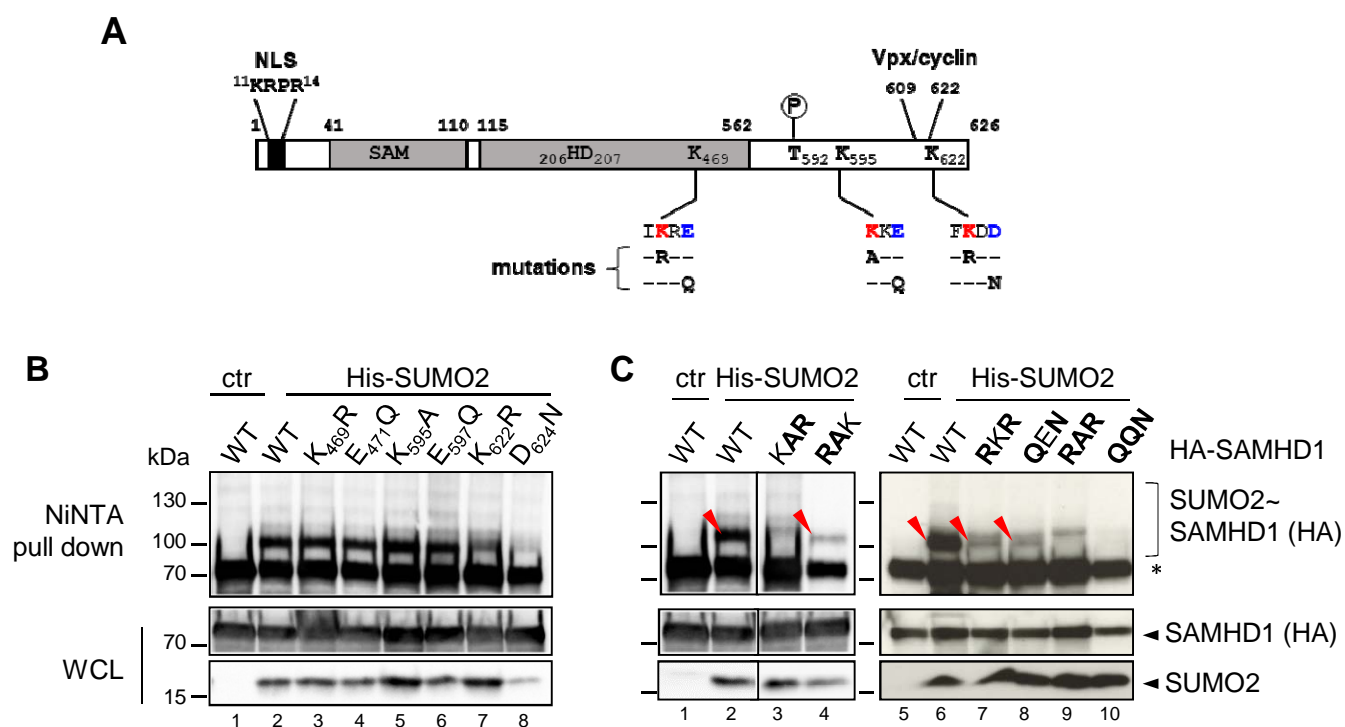

**Figure 2. Residues K469, K595 and K622 are major SUMO conjugation sites of SAMHD1. A.** Schematic representation of human SAMHD1 showing the nuclear localization signal (NLS), Sterile Alpha Motif (SAM) and Histidine/Aspartate (HD) domains, phosphorylatable T592 residue and the binding site for Vpx/cyclin A2. The position of the three putative SUMO consensus motifs (SCM) is indicated, with the SUMO acceptor K and the acidic amino acids colored in red and blue, respectively. Residue substitutions are described below each SUMOylation site (mutations were done on single or multiple sites as described in the text). **B.** HEK 293T cells overexpressing HA-SAMHD1 WT or single-site or **C.** multiple SUMO-site mutants, Ubc9 and His-SUMO2 were processed as in Fig. 1A. Mutated residues are in bold characters. WCL: whole cell lysate. \*, nonspecific binding of unmodified SAMHD1 on Ni-NTA beads. The red arrowheads indicate the ~100 kDa band corresponding to mono-SUMOylated SAMHD1 species. Results of one representative experiment are shown ( $n \geq 2$ ).



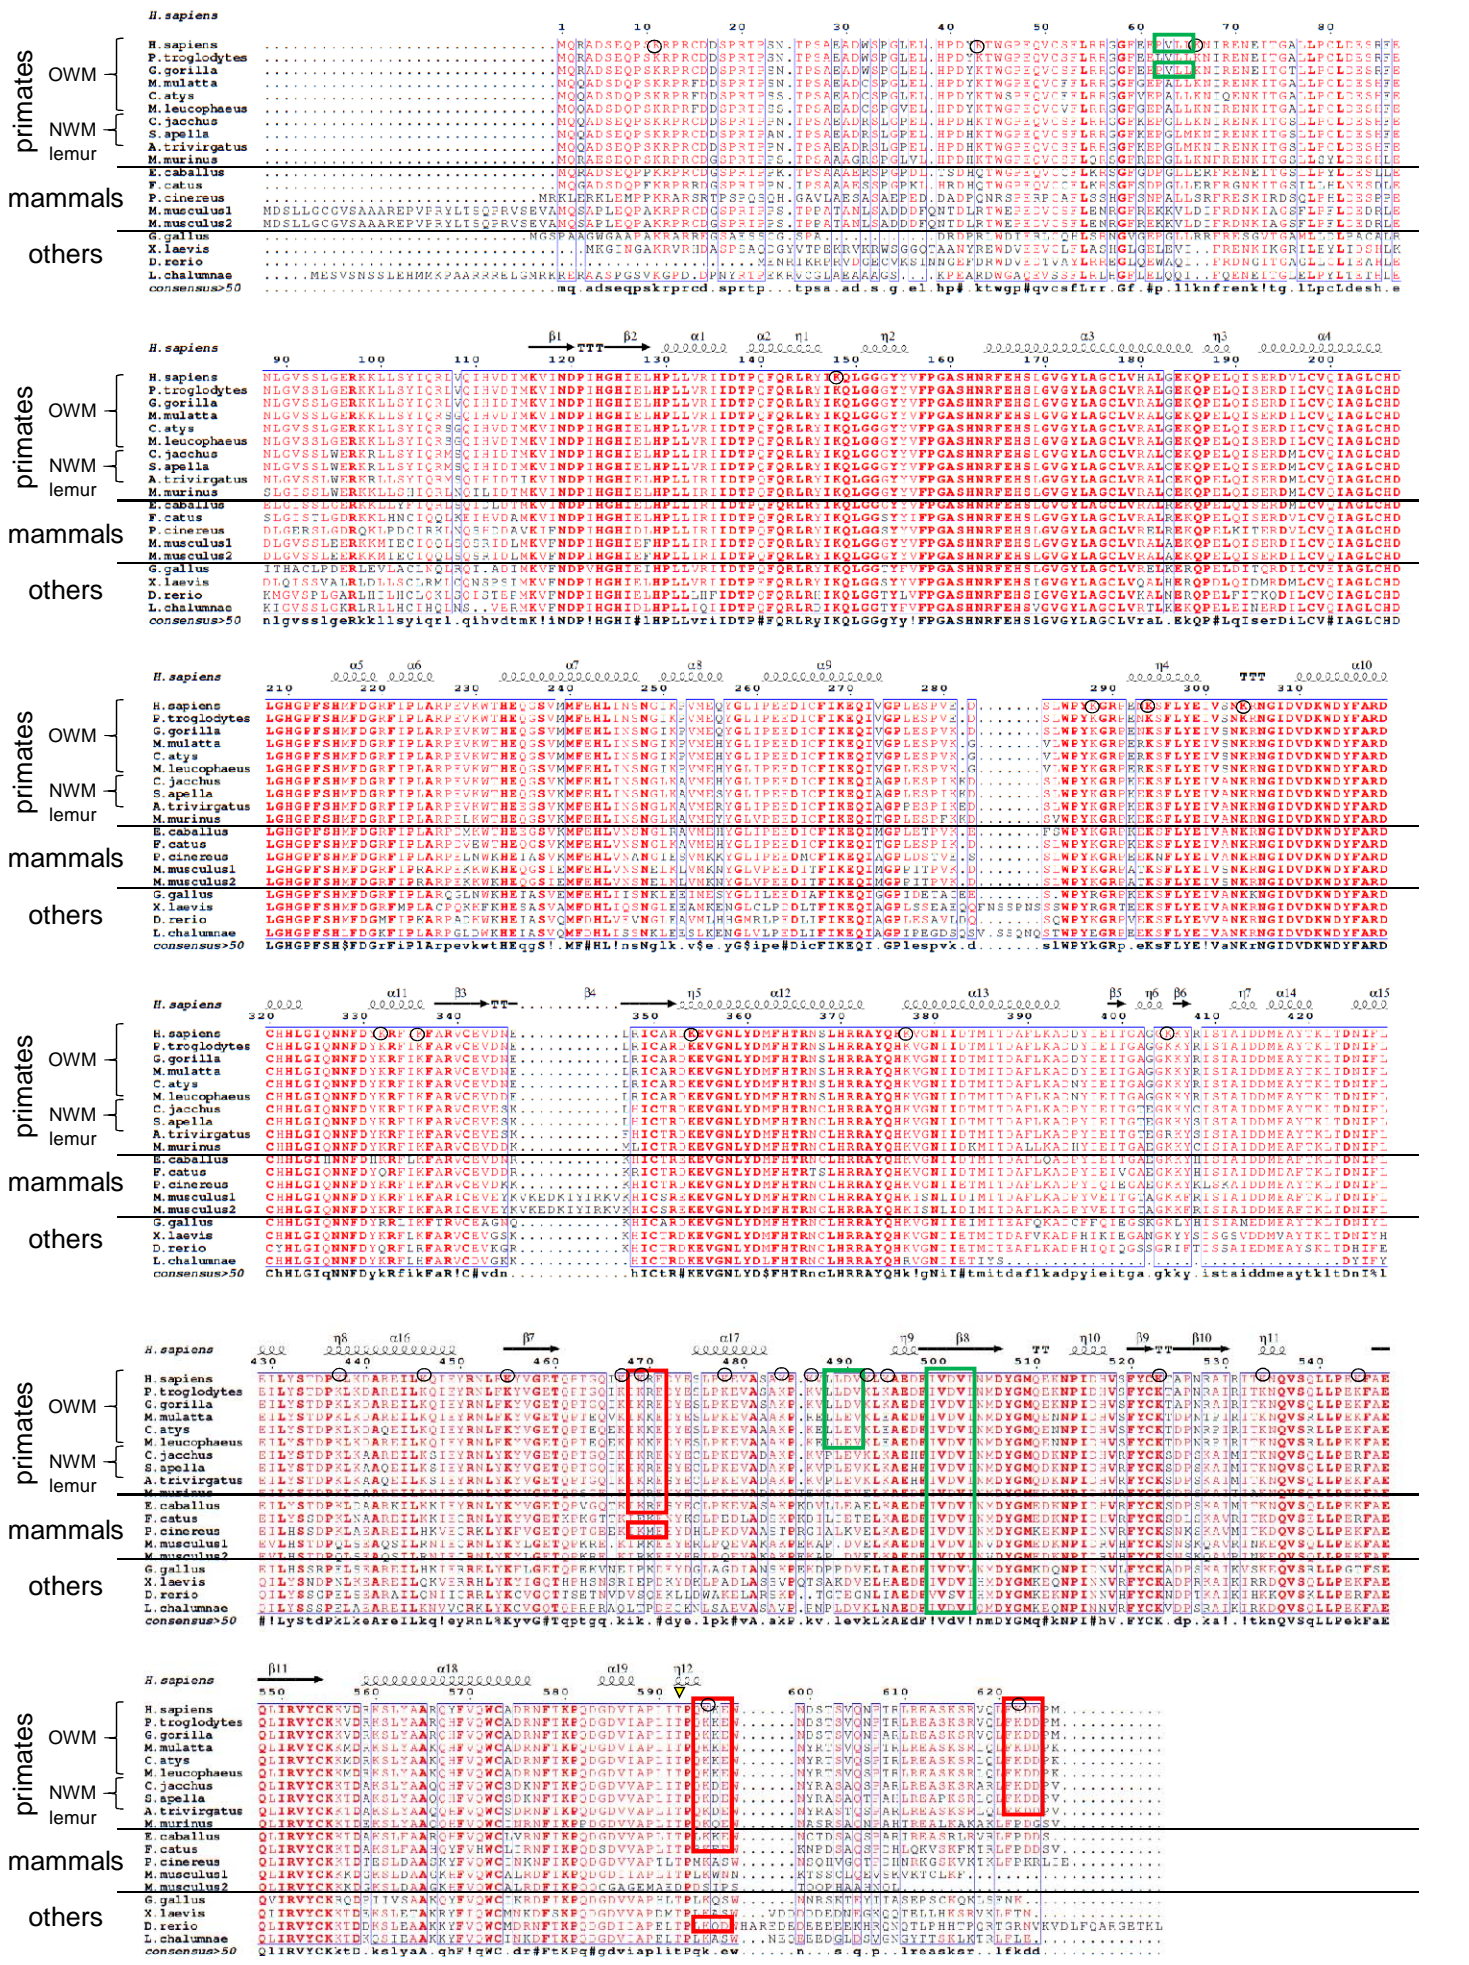

**Figure S3. Multi-alignment of SAMHD1 sequences from different species (related to Figs. 2 and 4).** Sequences of SAMHD1 isoforms from various vertebrate species were aligned using the MultiAlin software<sup>64</sup> and visualized using ESPRIT<sup>65</sup>. SUMOylation sites centered on K469, K595 and K622 are boxed in red, while SIM1, SIM2 and SIM3 are boxed in green. The black arrowhead points at the phosphorylatable T592 residue.

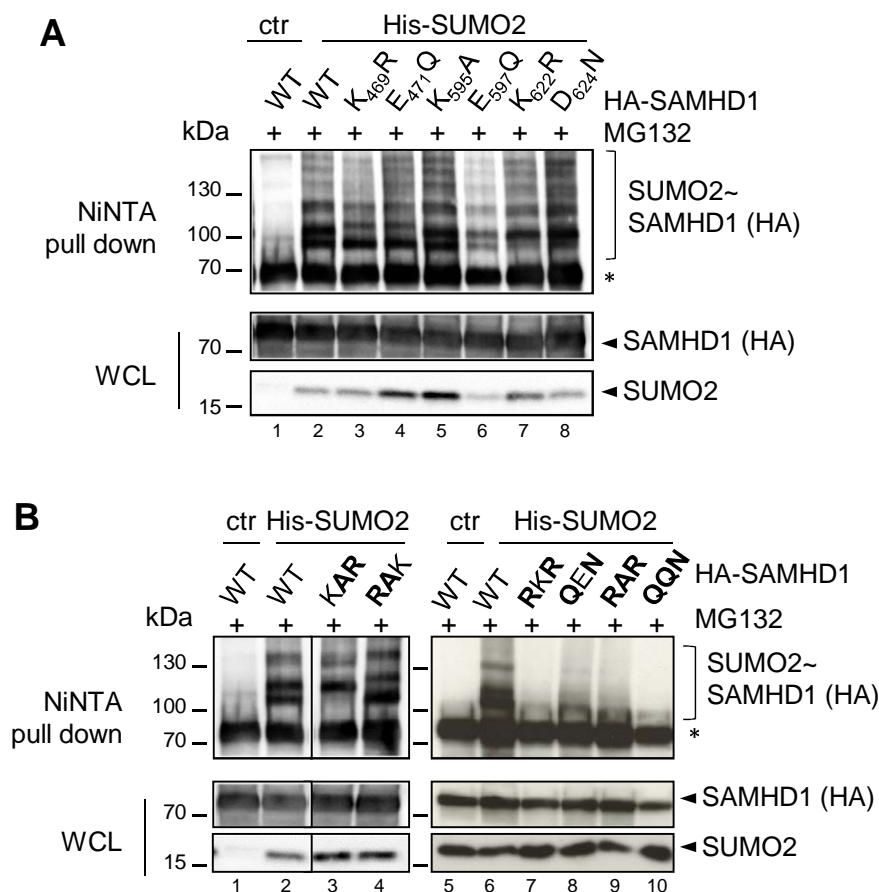

**Figure S4. Residues K469 and K622 are modified by SUMO chains that accumulate upon proteasome inhibition (related to Fig. 2).** **A.** HEK 293T cells were transfected with plasmids encoding HA-SAMHD1 WT or single or **B.** multiple SUMO-site mutants, Ubc9 and His-SUMO2 or the control empty plasmid (ctr). After 24 hours, samples were treated MG132 (3 $\mu$ M, ON) and then were processed as in Fig. 1A. Bold characters indicate the mutated residues as in Fig. 2C. WCL: whole cell lysate. \*, nonspecific binding of unmodified SAMHD1 on Ni-NTA beads. Results of one representative experiment are shown (n $\geq$ 2).

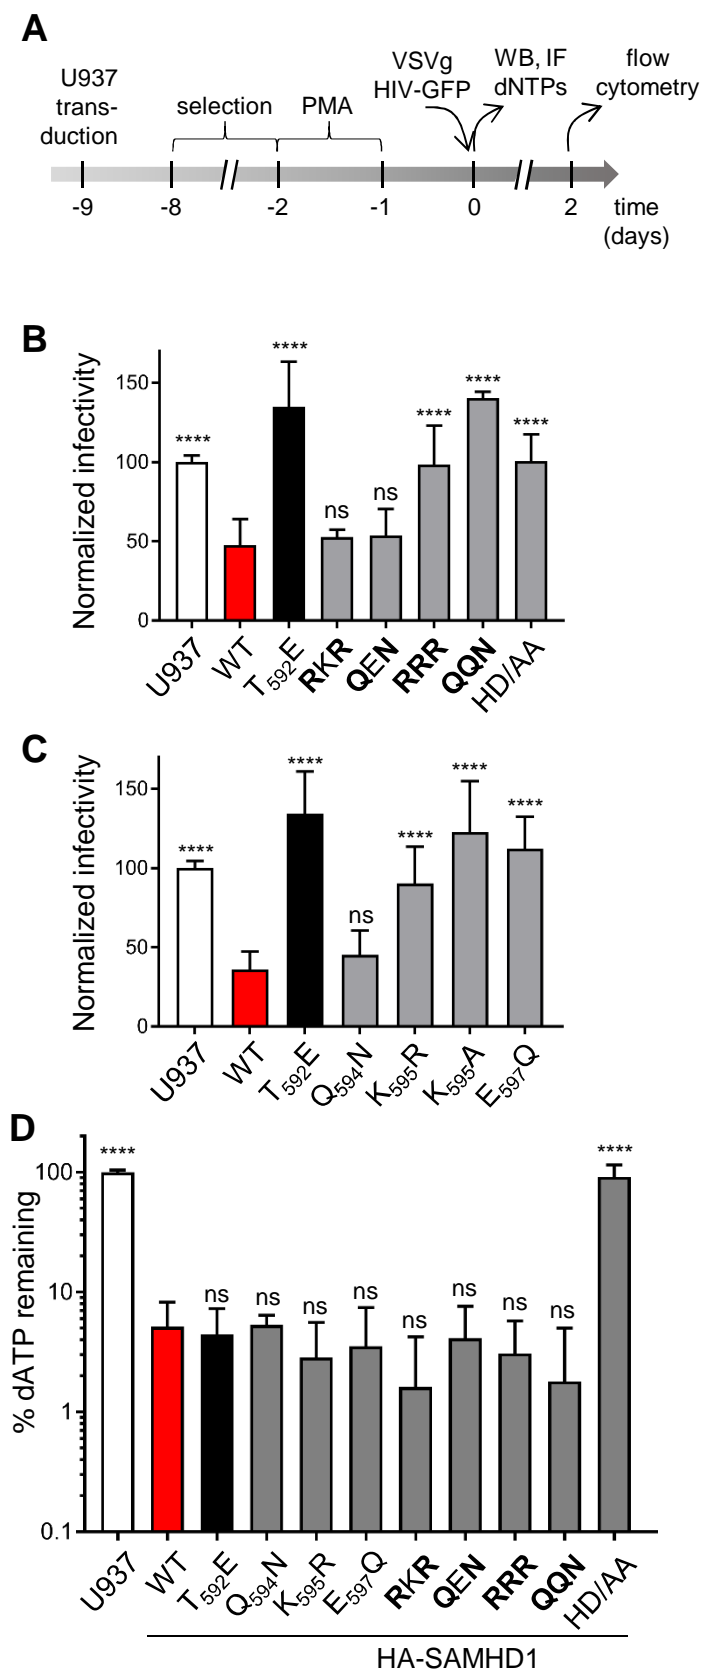

**Figure 3. SAMHD1 mutants impaired for SUMOylation on K595 are antivirally inactive but efficiently deplete the cellular dNTP pools.** **A.** U937 cell lines stably expressing HA-SAMHD1 WT or mutants ( $\geq 3$  independently generated cell lines) were treated according to the experimental outline. **B.** Differentiated U937 cell lines expressing the indicated multiple or **C.** single SUMO-site SAMHD1 variants were infected with the VSVg/HIV-1 $\Delta$ EnvEGFP virus in 3 to 4 technical replicates and analyzed by flow cytometry 48 hours later. Bold characters indicate the mutated residues as in Fig. 2. The infection rate of parental U937 cells was set to 100. Bars represent the mean  $\pm$ SD ( $n=3$  for B, 6 for C). Statistical significance was assessed by one-way ANOVA statistical test with a Dunnett's multiple comparison post-test. \*\*\*\*:  $p<0.0001$ . ns: not significant. **D.** Cellular dATP levels were quantified by single nucleotide incorporation assay<sup>9</sup>. The dNTP levels (%) of SAMHD1-expressing cells were calculated relative to those of parental U937 set to 100. Bars show the mean  $\pm$  SD ( $n\geq 3$ ). Statistical significance was assessed by one-way ANOVA test. \*\*\*\*:  $p<0.0001$ . ns: not significant.

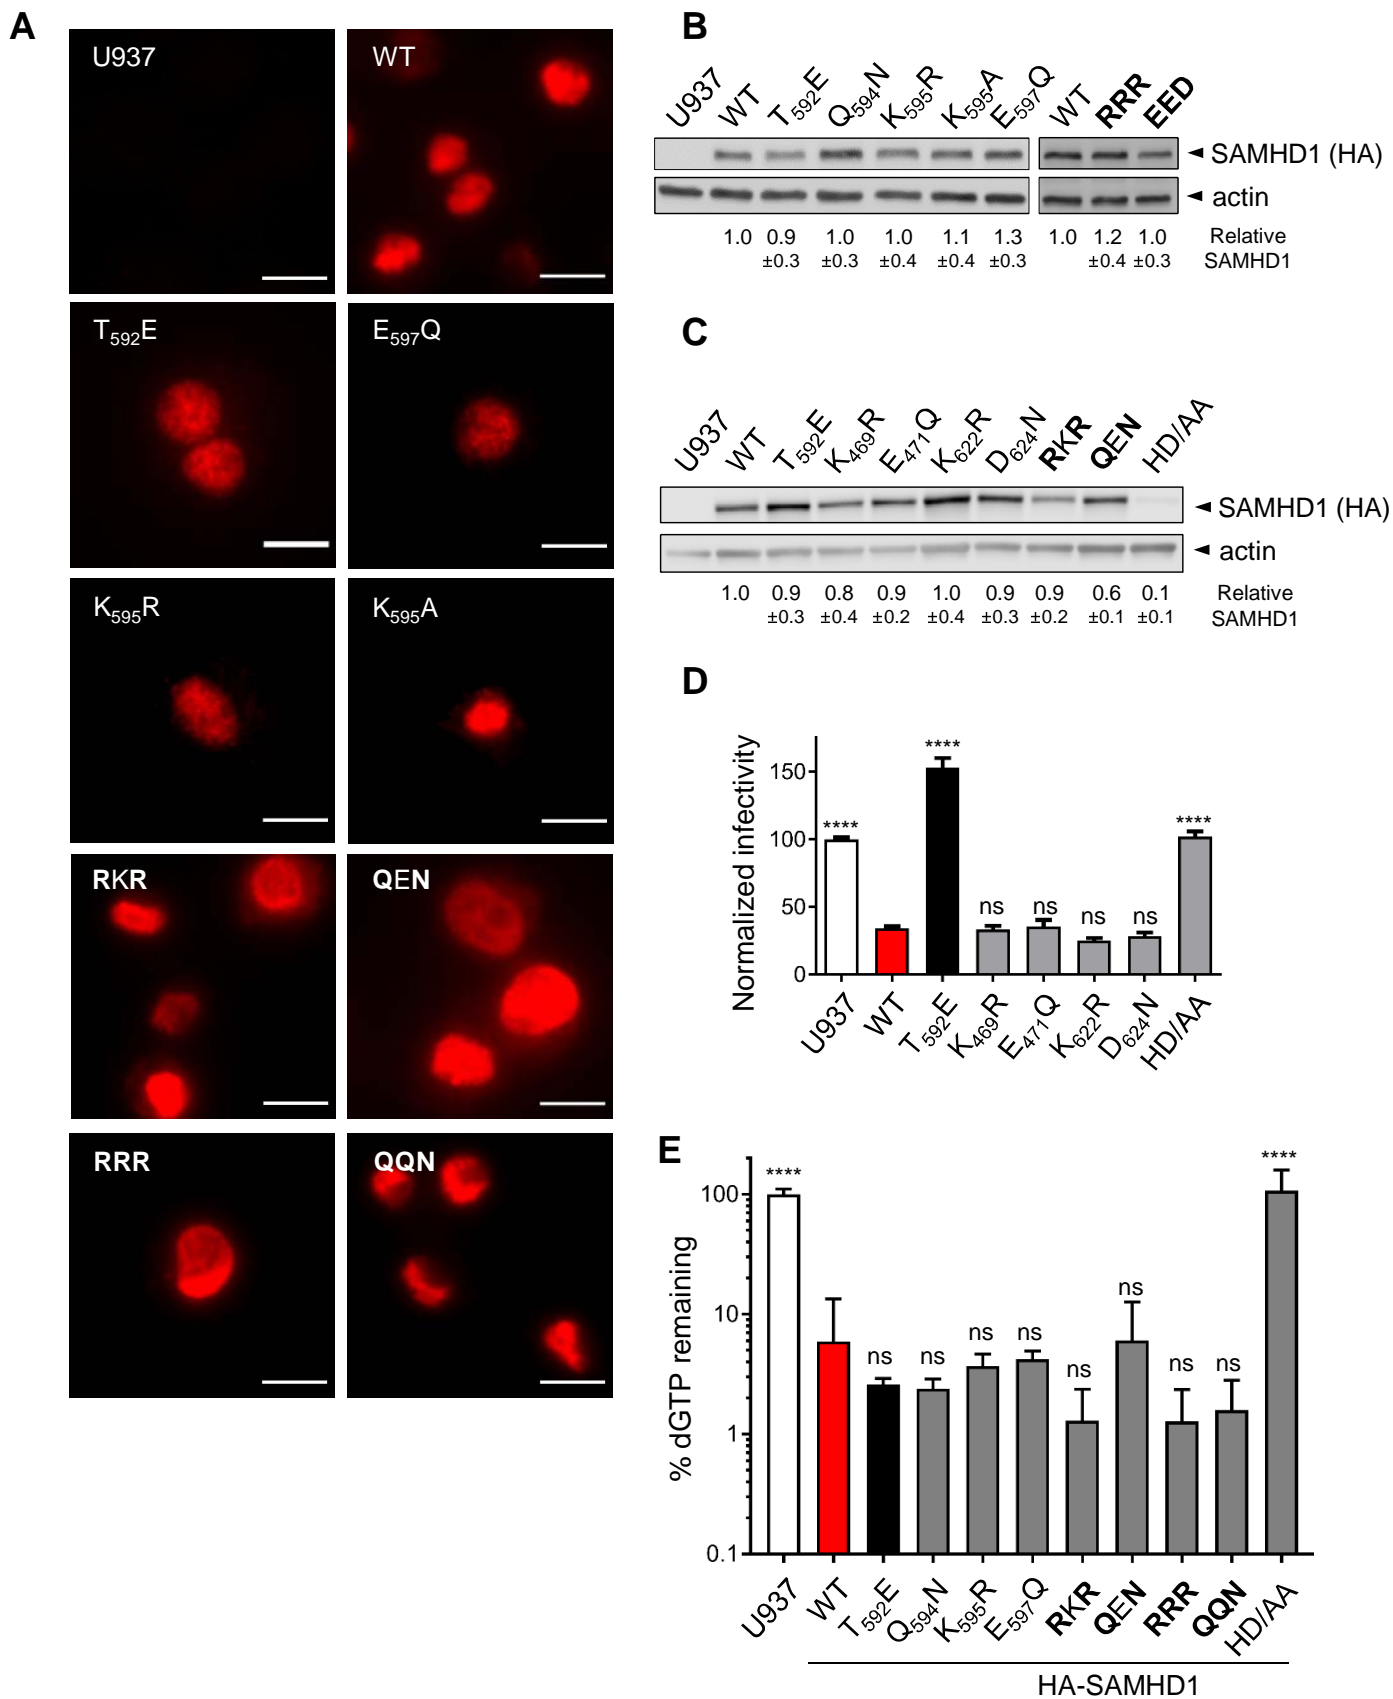

**Figure S5. Characterization of SUMOylation-defective SAMHD1 mutants (related to Fig. 3).** **A.** The localization of SAMHD1 mutants was assessed in differentiated U937 cells by immunofluorescence using an anti-HA antibody followed by anti-isotype secondary antibody coupled to the Alexa<sub>594</sub> dye. Images were acquired with an Axiovert 200 M inverted microscope, using a Plan Apo 63/1.4-N oil immersion objective. Scale bar = 10  $\mu$ m. **B.** The expression levels of SAMHD1 single or **C.** multiple SUMO-site variants stably expressed in U937 cells were monitored after PMA treatment (100  $\mu$ g/mL, 24h) in the total cell extract by immunoblotting (20  $\mu$ g total proteins/lane). Band intensities were quantified as in Fig. 5A (n=4). The WT SAMHD1/actin ratio was set to 1. Bold characters indicate the mutated residues as in Fig. 2C. **D.** U937 cell lines expressing the indicated HA-SAMHD1 variants (2 independently generated cell lines) were infected with VSVg/HIV-1 $\Delta$ EnvGFP virus in 4 technical replicates and analyzed as in Fig. 3B. Bars represent the mean  $\pm$ SD (n=3). Statistical significance was assessed by one-way ANOVA test. \*\*\*\*: p<0.0001. ns: not significant. **E.** Cellular dGTP levels were quantified as previously described<sup>9</sup>. The dGTP levels (%) of SAMHD1-expressing cells were calculated relative to those of parental U937 set to 100. Bars show the mean  $\pm$  SD (n $\geq$ 3). Statistical significance was assessed by one-way ANOVA test. \*\*\*\*: p<0.0001. ns: not significant.

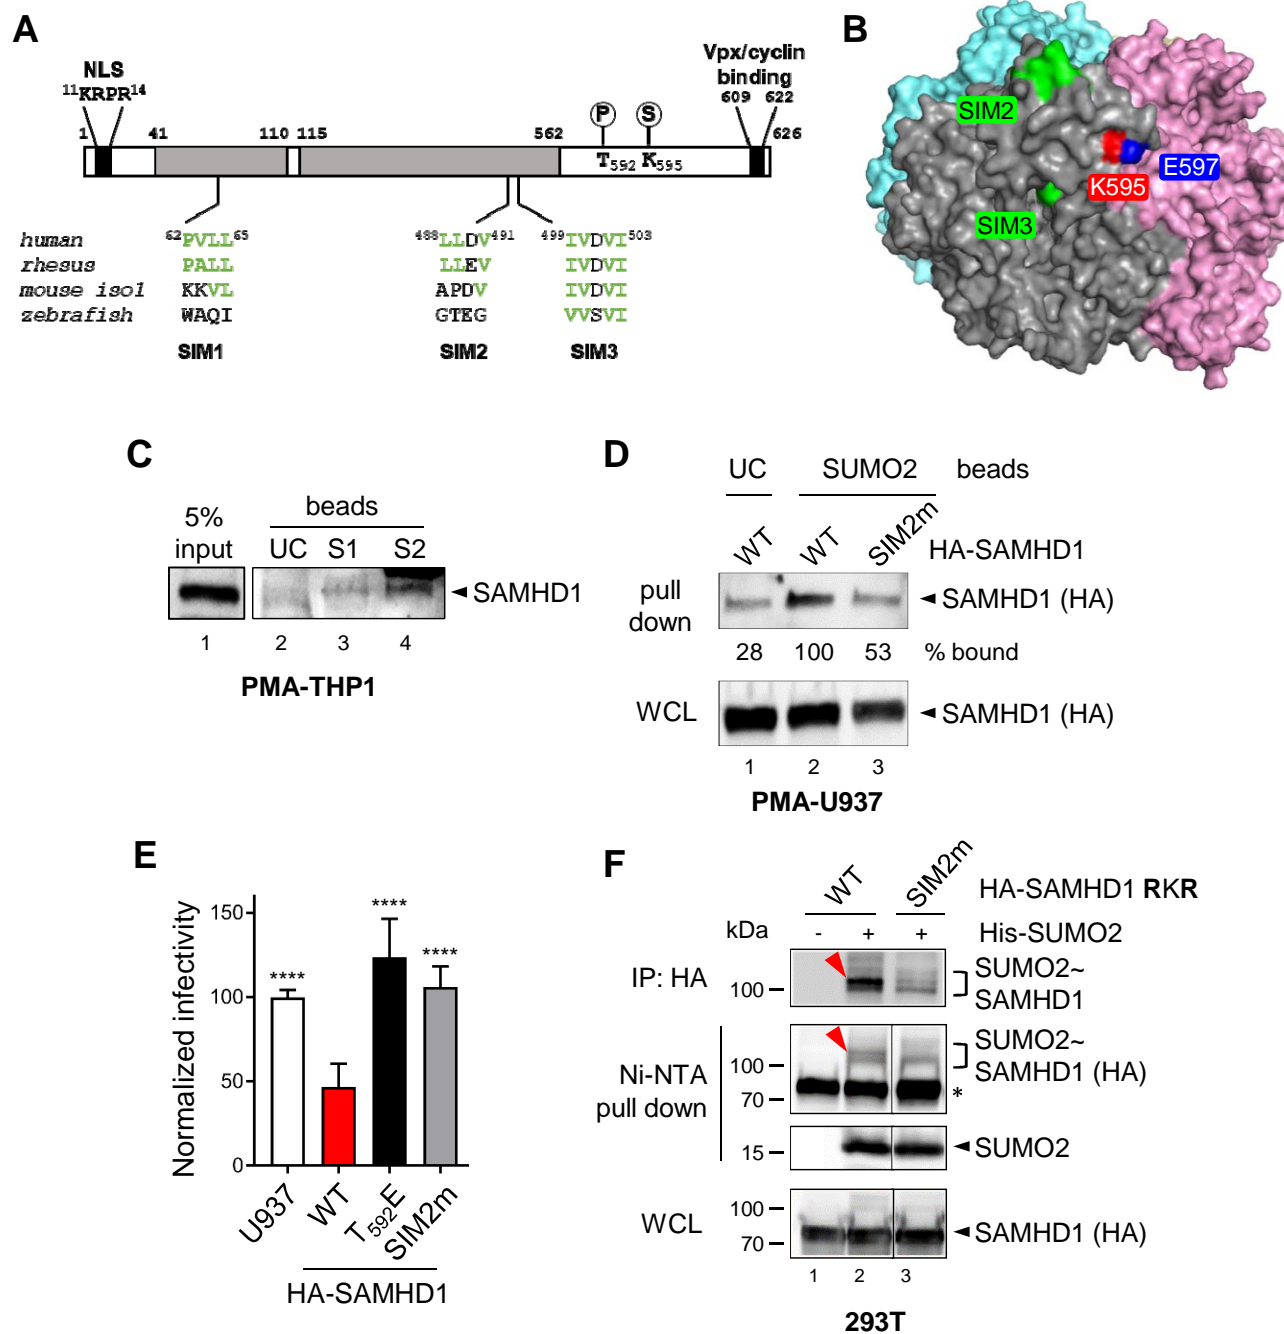

**Figure 4. Integrity of SAMHD1 SIM2 is required for both HIV-1 restriction and K595 SUMOylation.** **A.** Schematic representation of human SAMHD1 (NP\_056289.2), showing the position and sequence of the putative SIMs and alignments with corresponding sequences of isoforms from Rhesus macaque (NP\_001258571.1), mouse (NP\_061339.3, isoform 1) and zebrafish (NP\_001153405.1). **B.** Position of SIM2 and SIM3, K595 and E597 within one protomer of human SAMHD1 tetramer (PDB: 4BZC). **C.** The lysate of differentiated THP1 cells was split in equal aliquots that were incubated with agarose beads coated with either human recombinant SUMO1 (S1) or SUMO2 (S2), or uncoated beads (UC) as control. Proteins from the input and the eluates were separated by migration on a 4-15% SDS-PAGE gel and, next, visualized by immunoblotting using antibodies against SAMHD1. Results of one representative experiment are shown (n=3). **D.** The lysate of differentiated U937 cells expressing WT or SIM2m SAMHD1 variants was incubated with SUMO2-coated agarose beads and treated as in C. The band intensities were quantified with ImageJ software. Results of one representative experiment are shown (n=2). **E.** U937 cells stably expressing the indicated HA-SAMHD1 variants (3 independently generated cell lines) were infected with the VSVg/HIV-1 $\Delta$ EnvEGFP virus in 4 technical replicates and analyzed as in figure 3B. Bars represent the mean  $\pm$ SD (n=4). The infection rate of parental U937 cells was set to 100. Statistical significance was determined by one-way ANOVA test. \*\*\*\*: p<0.0001. **F.** HEK 293T cells overexpressing HA-SAMHD1 RKR mutant, Ubc9 and His-SUMO2 were lysed in denaturing conditions and split in two equal aliquots that were subject to affinity purification on either Ni-NTA or HA-matrix beads. Eluted proteins were analyzed as described in Fig. 1A. WCL: whole cell lysate. Results of one representative experiment are shown (n=2). The red arrowhead highlights the SUMO-conjugated K595 SAMHD1 specie. \*, nonspecific binding of unmodified SAMHD1 on Ni-NTA beads.



**A**

| Results for putatifs SIM [PS <sub>max</sub> =38.183   Cut-off=0.269] |                                |                   |                     |       |          |
|----------------------------------------------------------------------|--------------------------------|-------------------|---------------------|-------|----------|
| Position site                                                        | Sequence                       | Type              | $\alpha$ /S stretch | PS    | DB Hit   |
| AA 62-65                                                             | LRRGGFEE <b>PVLL</b> KNIRENEI  | SIM Type 4        | [N][SIM][N]         | 0.382 |          |
| AA 488-491                                                           | VASAKPKV <b>LLDV</b> KLKAEDFI  | SIM Type 1        | [N][SIM][N]         | 0.335 | <u>1</u> |
| AA 499-502                                                           | VKLKAEDF <b>IVDV</b> INMDYGMQ  | SIM Type $\beta$  | [N][SIM][N]         | 4.191 | <u>1</u> |
| AA 500-503                                                           | KLKAEDFI <b>VDVI</b> INMDYGMQE | SIM Type $\alpha$ | [N][SIM][N]         | 0.665 |          |

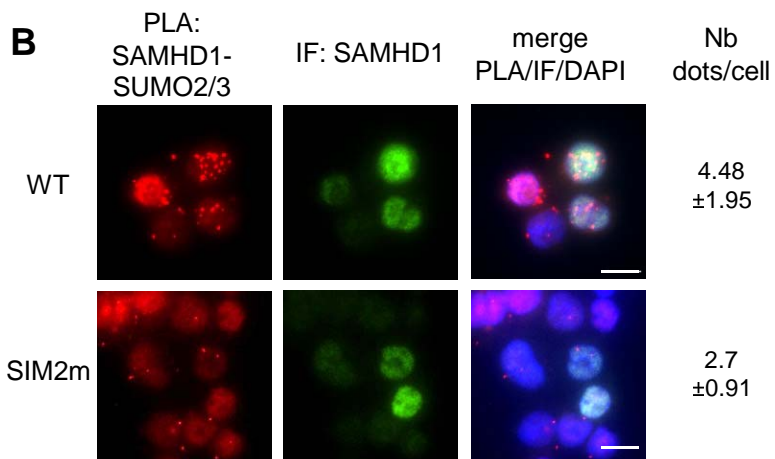

**Figure S6. The SIM2 of human SAMHD1 is important for the non-covalent interaction with SUMO proteins (related to Fig. 4).** **A.** *In silico* analysis with JASSA<sup>46</sup> predicts the presence of several SIMs in the sequence of human SAMHD1. **B.** Differentiated U937 cell lines stably expressing WT or SIM2m SAMHD1 variants were processed for PLA and analyzed as in Fig. 1D.

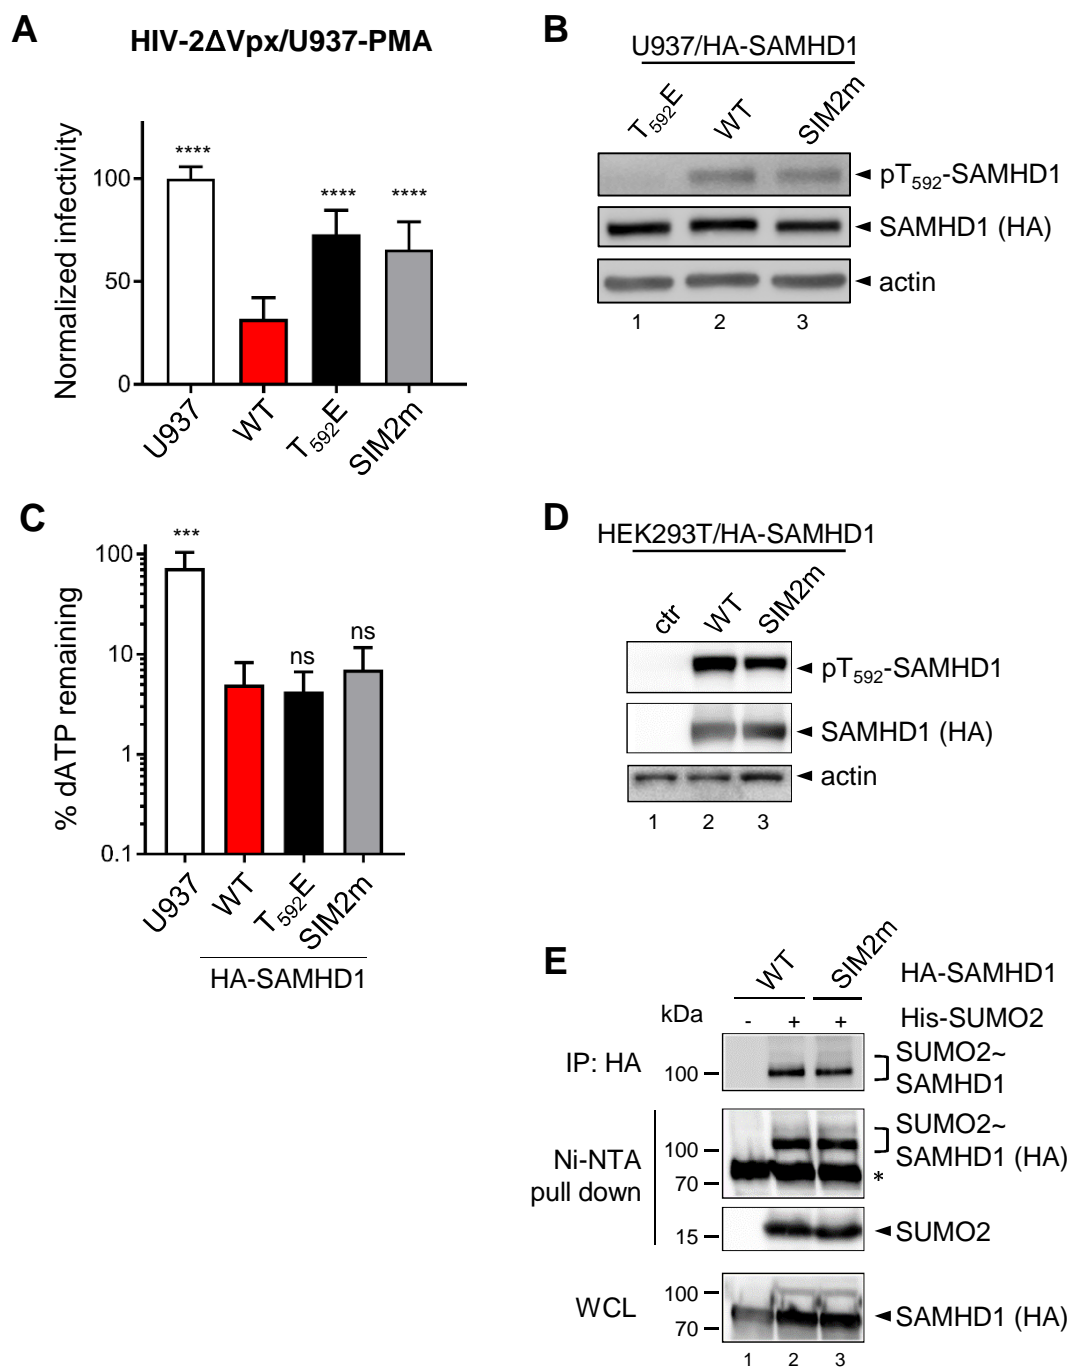

**Figure S7. SAMHD1 SIM2m variant does not restrict HIV-2 $\Delta$ Vpx but has WT dNTPase activity (related to Fig. 4).** **A.** U937 cells stably expressing HA-SAMHD1 WT or SIM2m mutant (3 independent transductions) were differentiated by PMA treatment (100ng/mL, 24 h) and then challenged with VSVg/HIV-2 $\Delta$ VpxGFP in 4 technical replicates. Analysis was performed as in Fig. 3B. Bars represent the mean  $\pm$ SD (n=4). Statistical significance was assessed by one-way ANOVA test. \*\*\*\*: p<0.0001. ns: not significant. **B.** The levels of total and phosphorylated SAMHD1 were monitored in the crude extract of differentiated U937 cell lines using an anti-HA or anti-pT592 specific antibody (10  $\mu$ g total proteins/line). Actin was used as loading control. The band intensities were quantified by densitometry with ImageJ software (n=3). The SAMHD1/actin and pT592/unmodified SAMHD1 ratios for WT SAMHD1-expressing cells were set to 1. **C.** The levels of dATP were quantified and normalized as in Fig. 3D. The dNTP levels of U937 were set to 100%. Bars show the mean  $\pm$  SD (n=4). Statistical significance was assessed by one-way ANOVA test. \*\*\*\*: p<0.0001. ns: not significant. **C.** The levels of total and phosphorylated SAMHD1 were monitored in the crude extract of transfected 293T cells and analyzed as in B. **E.** HEK 293T cells overexpressing WT or SIM2m HA-SAMHD1 mutants, Ubc9 and His-SUMO2 were treated as in Fig. 6E. Results of one representative experiment are shown (n=2). \*, nonspecific binding of unmodified SAMHD1 on Ni-NTA beads.

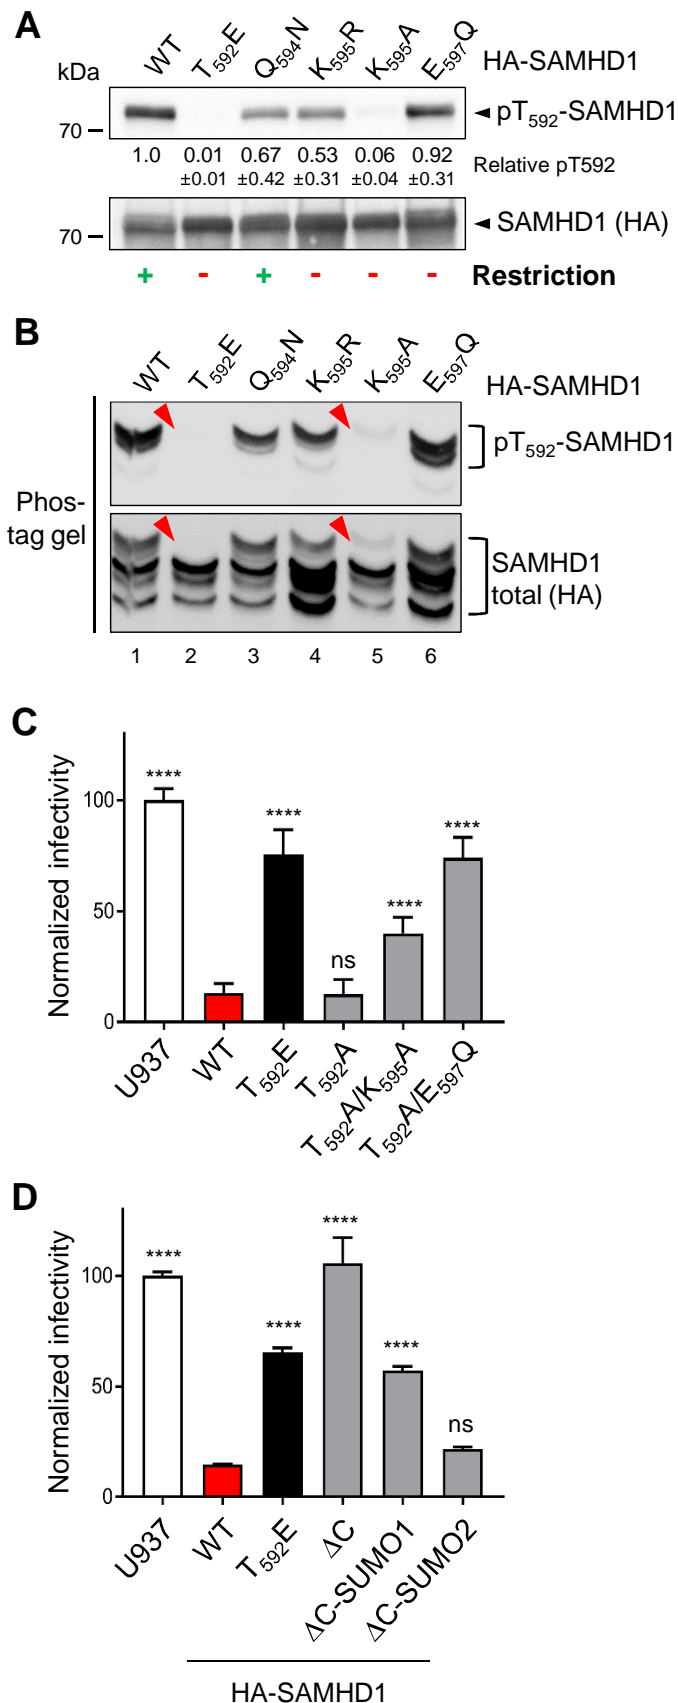

**Figure 5. Dephosphorylated T592 is not sufficient to render SAMHD1 antivirally active, concomitant SUMOylation of K595 is required.** **A.** Proteins (10  $\mu$ g total proteins/line) contained in the crude extract of 293T cells overexpressing HA-SAMHD1 variants were loaded on a 4-15% pre-casted SDS-PAGE gel. Immunoblotting was performed sequentially with an anti-pT592 or anti-HA antibody to detect either phosphorylated or total SAMHD1 species, respectively. The band intensities were quantified by densitometry with ImageJ software and the pT592/total SAMHD1 ratio for WT SAMHD1-expressing cells was set to 1. Results of one representative experiment are shown (n=2). The ability of SAMHD1 mutants to restrict (green +) or not (red -) viral infection is indicated. **B.** The same samples as in A were separated on a 7% Phos-tag<sup>TM</sup> SDS-PAGE gel. Arrowheads indicate that T592 phosphorylated SAMHD1 species which become undetectable upon T592E or K595A mutation. Results of one representative experiment are shown (n=3). **C.** and **D.** U937 cells stably expressing the indicated HA-SAMHD1 mutants were infected with the VSVg/HIV-1 $\Delta$ EnvEGFP virus in 4 technical replicates and analyzed by flow cytometry 24 hours later. The infection rate of parental U937 cells was set to 100. Bars represent the mean  $\pm$ SD (n=2). Statistical significance was determined by one-way ANOVA test. \*\*\*\*: p<0.0001. ns: not significant.

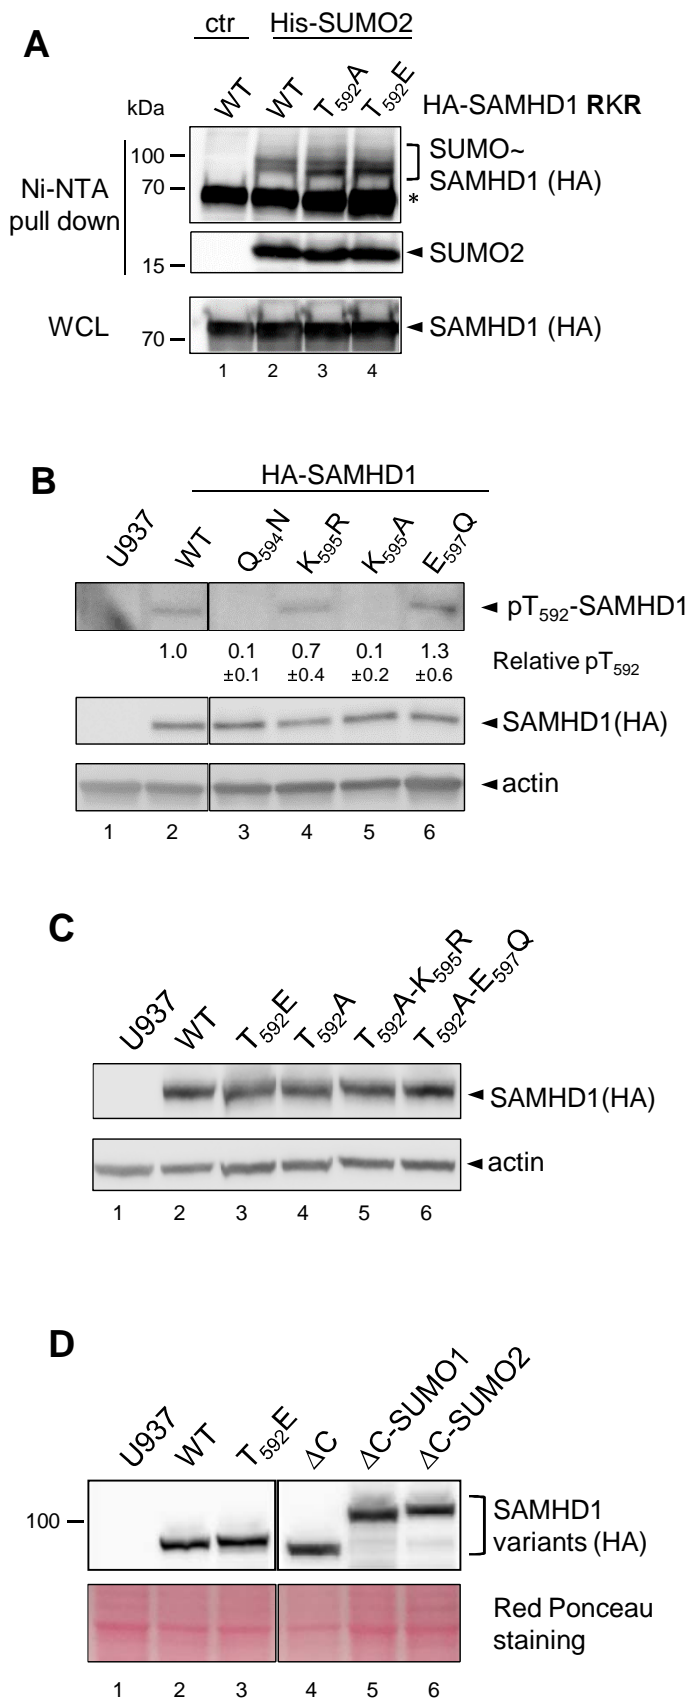

**Figure S8. The phosphorylation status of T592 does not influence K595 SUMOylation, while SUMOylation-deficient K595A SAMHD1 mutant is hypophosphorylated (related to Fig. 5).**

**A.** HEK 293T cells overexpressing the indicated HA-SAMHD1 variants, Ubc9 and His-SUMO2 were processed as in Fig. 1A. WCL: whole cell lysate. One representative experiment is shown (n=4).

**B.** The expression levels of SAMHD1 variants stably expressed in differentiated U937 cells were monitored in the total cell extract by immunoblotting (20 μg total proteins/lane). Band intensities were quantified as in Fig. 5A. The WT SAMHD1/actin ratio was set to 1 (n=3).

**C. and D.** The expression levels of SAMHD1 variants were analyzed in the crude lysate of differentiation of U937 cell lines (15 μg total proteins/lane).

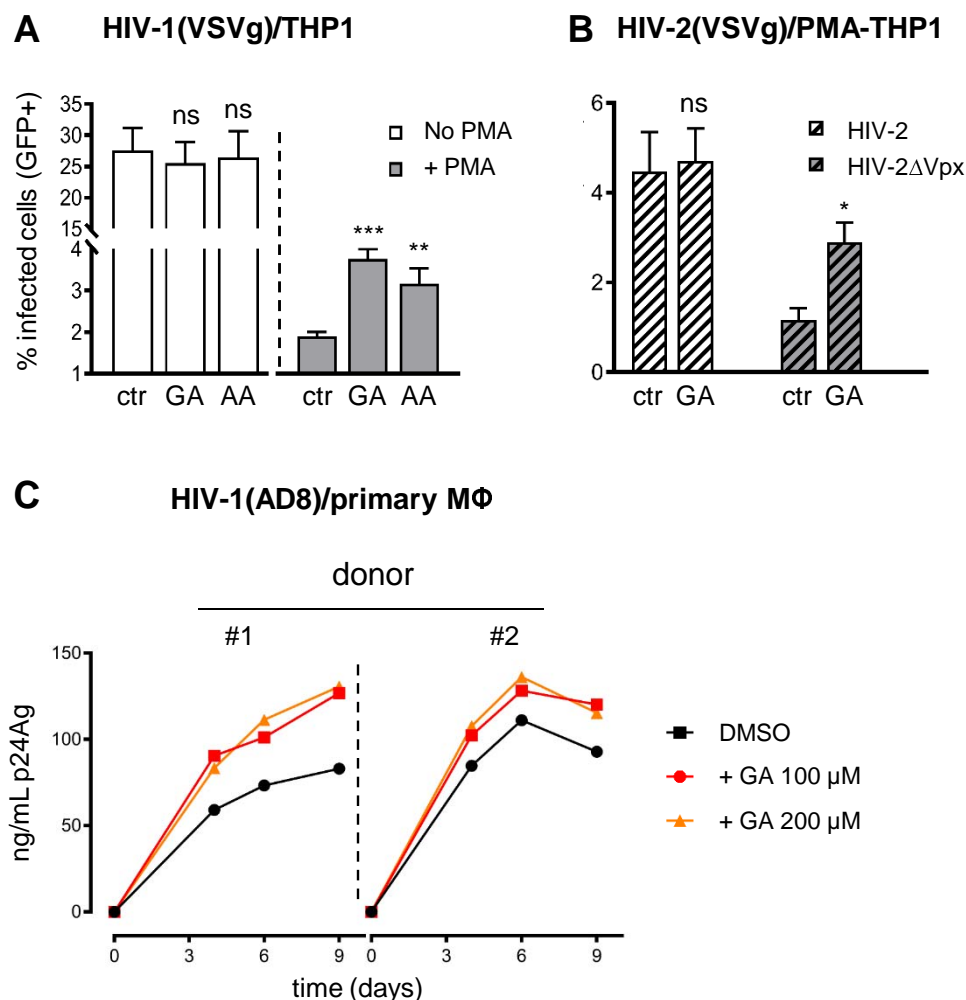

**Figure 6. Infectivity of SAMHD1-sensitive viruses is enhanced by inhibition of SUMOylation in macrophages.** **A.** THP1 cells were differentiated into macrophage-like cells by incubation with PMA (100 ng/mL, 24 h), or left untreated. Twenty-four hours later SUMOylation was inhibited by exposure to ginkgolic acid (GA, 50μM) or anacardic acid (AA, 50μM) for 2 hours before challenge with VSVg-pseudotyped HIV-1 (moi = 0.2), **B.** HIV-2 or HIV-2ΔVpx (moi = 0.3) viruses harboring the *EGFP* reporter gene. The percentage of infected (GFP-positive) cells was measured by flow cytometry after 48 hours. Bars represent mean ± SD of 3 technical replicates. One representative experiment is shown (n=5 for A, 2 for B). Statistical significance was assessed by 2 way-ANOVA with Sidak's multiple comparisons test. \*: p<0.05; \*\*: p<0.01; \*\*\*: p<0.001; ns: not significant. **C.** Monocyte-derived macrophages generated from 2 healthy donors were pretreated with GA or vehicle (DMSO, 2h) before challenge with the AD8 HIV-1 strain (10 ng/mL p24Ag). Viral replication was monitored overtime by measuring the p24 antigen (p24Ag) released in the cell culture supernatant.

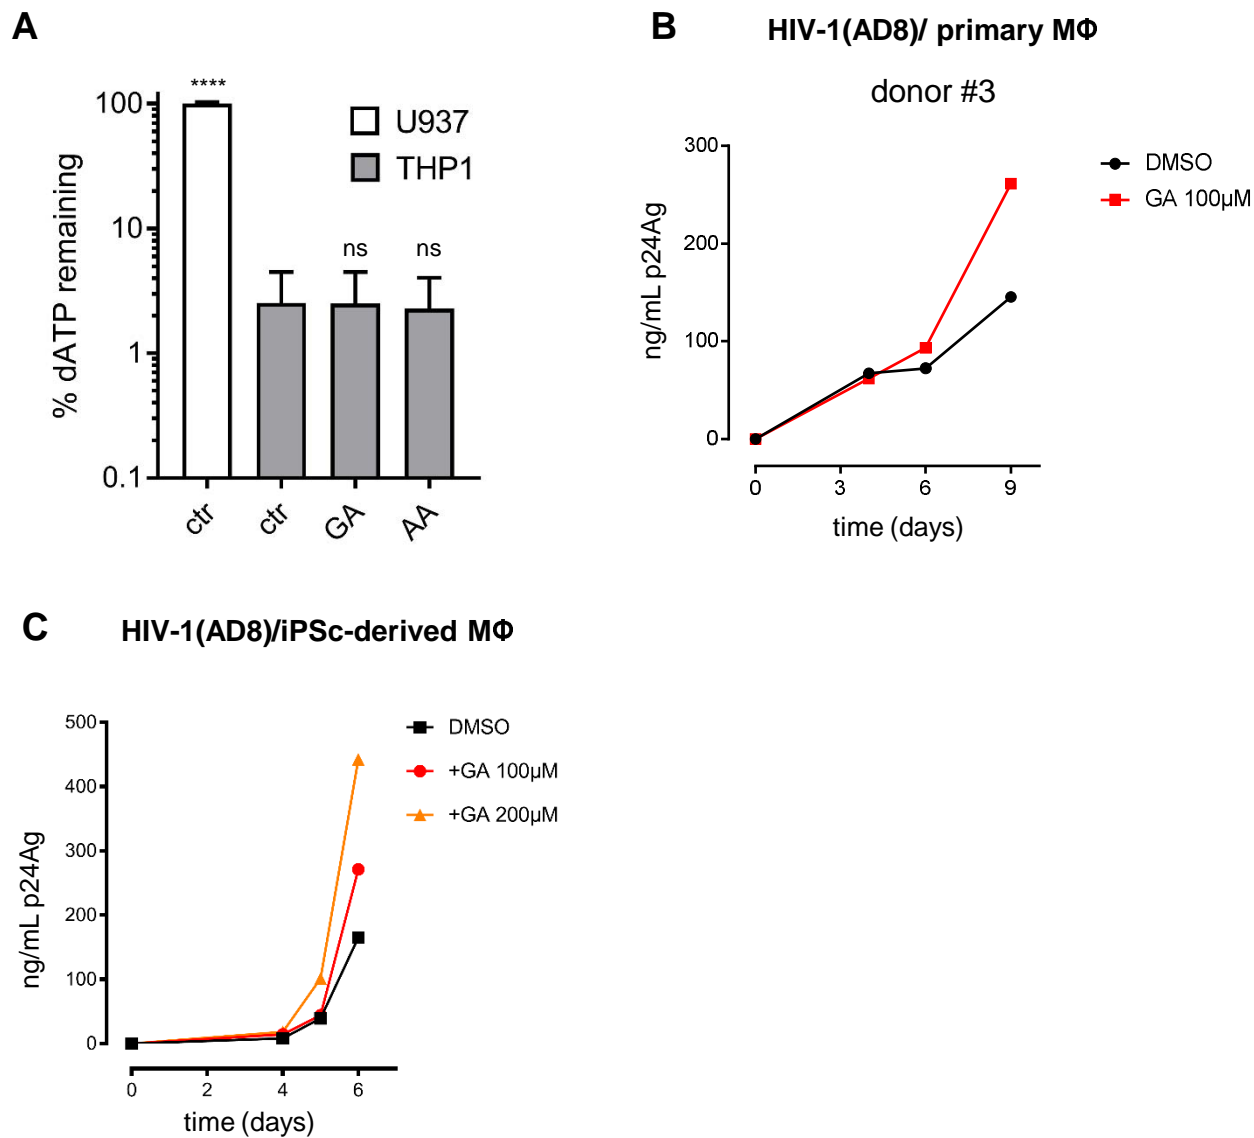

**Figure S9 (related to Fig. 6). Inhibition of SUMOylation enhances HIV-1 spreading in human monocyte-derived macrophages without modifying dATP levels.** **A.** Cellular dATP levels were quantified as in Figure 3D. The dNTP levels of U937 were set to 100 %. Bars show the mean  $\pm$  SD (n=4). Statistical significance was assessed by one-way ANOVA test. \*\*\*\*:  $p < 0.0001$ . ns: not significant. **B.** Viral replication kinetics in primary MDMs from a healthy donor or **C.** macrophages derived from induced-pluripotent stem cells (iPSc) pretreated with ginkgolic acid (GA, 2h) and then challenged with the AD8 HIV-1 strain (10 ng/mL p24Ag). Viral replication was analyzed as in Fig. 6C.

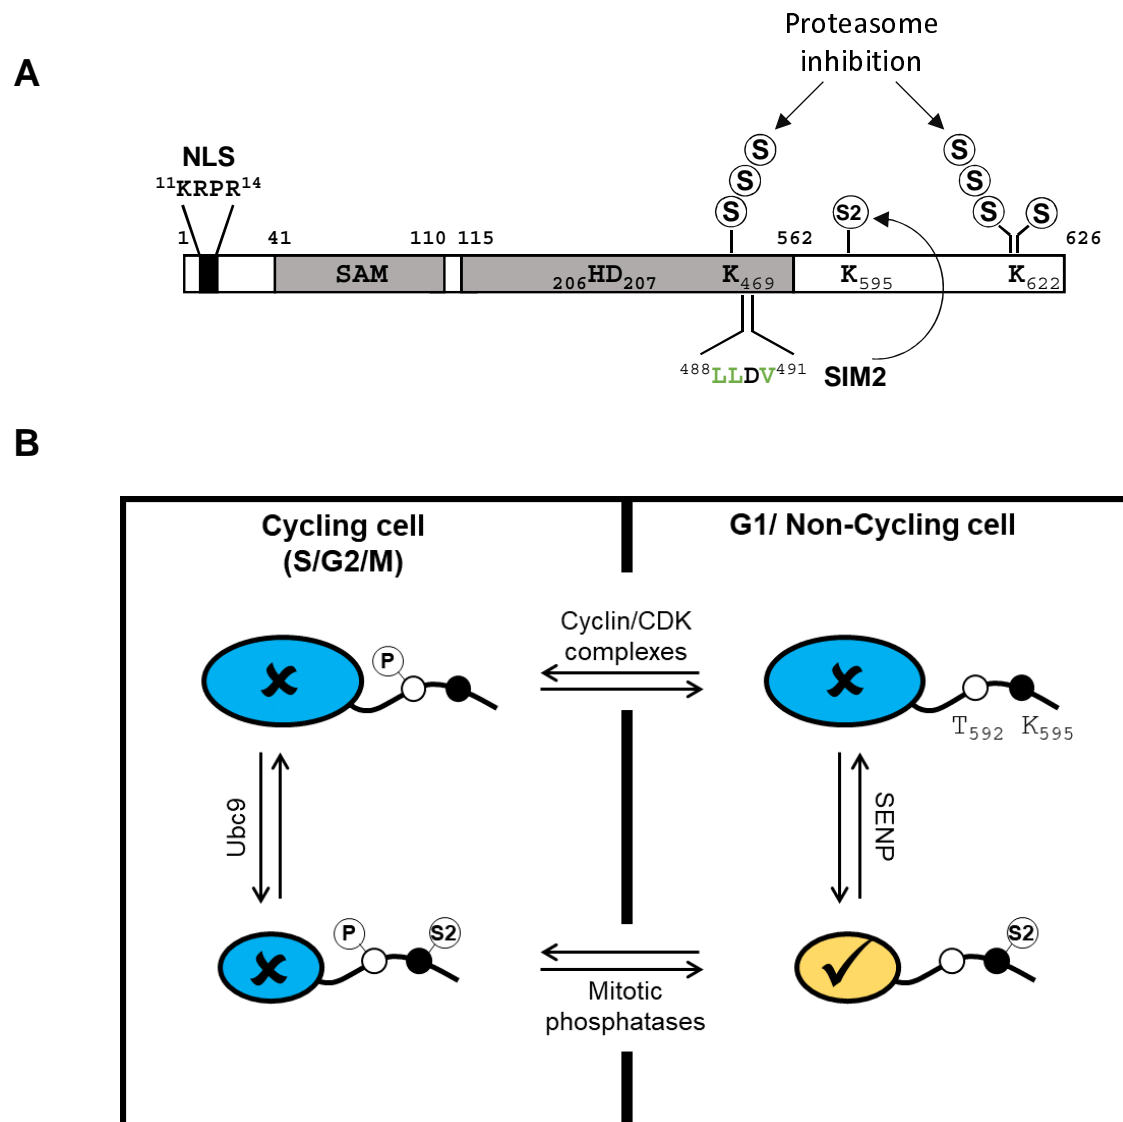

**Figure 7. Model for the regulation of SAMHD1 antiviral activity by SUMOylation in non-dividing cells.** **A.** Human SAMHD1 harbors three major SUMO-attachment sites: K595 and K622 undergo mono-SUMOylation, while K469 and K622 are targeted by SUMO chains, which accumulate upon inhibition of the proteasome. Human SAMHD1 also harbors the surface-exposed SIM2 sequence, which drives the modification of K595 by SUMO, likely with a preference for the SUMO2 isoform (S2). **B.** In actively dividing cells, SAMHD1 is targeted by CDK/cyclin-mediated phosphorylation on T592 during the G1/S transition thereby losing its antiviral activity (✖, colored in blue). A fraction of SAMHD1 (smaller circle) might be SUMOylated on K595 by the action of Ubc9. However, this modification appears insufficient to neutralize the effects of phosphorylation and rescue restriction. Upon mitotic exit, phosphorylation is reversed by host PPP family phosphatases. Our results show that SAMHD1 harboring dephosphorylated T592 is antivirally inactive if SUMO-conjugation to K595 is prevented. They also indicate that only the fraction of SAMHD1 that harbors SUMOylated K595 and dephosphorylated T592 (✓, colored in yellow) inhibits viral infection through a dNTPase-independent mechanism.
